# Supplementary material for: Biosurfactants' production with substrates from the sugar industry – environmental, cost, market, and social aspects
Source: Royal Society of Chemistry journal article supplement (doi:10.1039/d3su00122a), 2023-01-01
Supplement: d3su00122a1.pdf [file d3su00122a1.pdf]

## Supplementary material

### “Biosurfactants’ production with substrates from sugar industry - Environmental, cost, market, and social aspects”

*Andreas Schonhoff, Gerrit Stöckigt, Christina Wulf, Petra Zapp, Wilhelm Kuckshinrichs*

|     |                                                                                               |       |
|-----|-----------------------------------------------------------------------------------------------|-------|
| I.  | Additional figures and tables                                                                 | p. 2  |
|     | Supplementary Figure S1: Process flow chart RL_SBP                                            | p. 2  |
|     | Supplementary Figure S2: Plant setup MEL_MOL                                                  | p. 3  |
|     | Supplementary Table S1: Allocation data sugar beet processing                                 | p. 4  |
|     | Supplementary Table S2: Calculation structure CA (+ exemplary data & explaining text section) | p. 6  |
|     | Supplementary Figure S3: Exemplary cost and pricing structure                                 | p. 8  |
|     | Supplementary Table S3: Equipment cost MEL_MOL                                                | p. 9  |
|     | Supplementary Table S4: Mainly contributing process modules and flows                         | p. 10 |
|     | Supplementary Table S6: Data sources for material and services                                | p. 12 |
|     | Supplementary Figure S4: Comparison market prices                                             | p. 18 |
|     | Supplementary Table S7: Specific prices for sophorolipids                                     | p. 19 |
| II. | Supplementary chapter S-LCA                                                                   | p. 20 |
|     | Background S-LCA                                                                              | p. 20 |
|     | Study framework S-LCA                                                                         | p. 21 |
|     | Impact categories and indicators S-LCA                                                        | p. 21 |
|     | Applied data for S-LCA                                                                        | p. 22 |
|     | Results of S-LCA                                                                              | p. 24 |
|     | Literature sources S-LCA                                                                      | p. 28 |

# I. Additional figures and tables

## Process flow chart

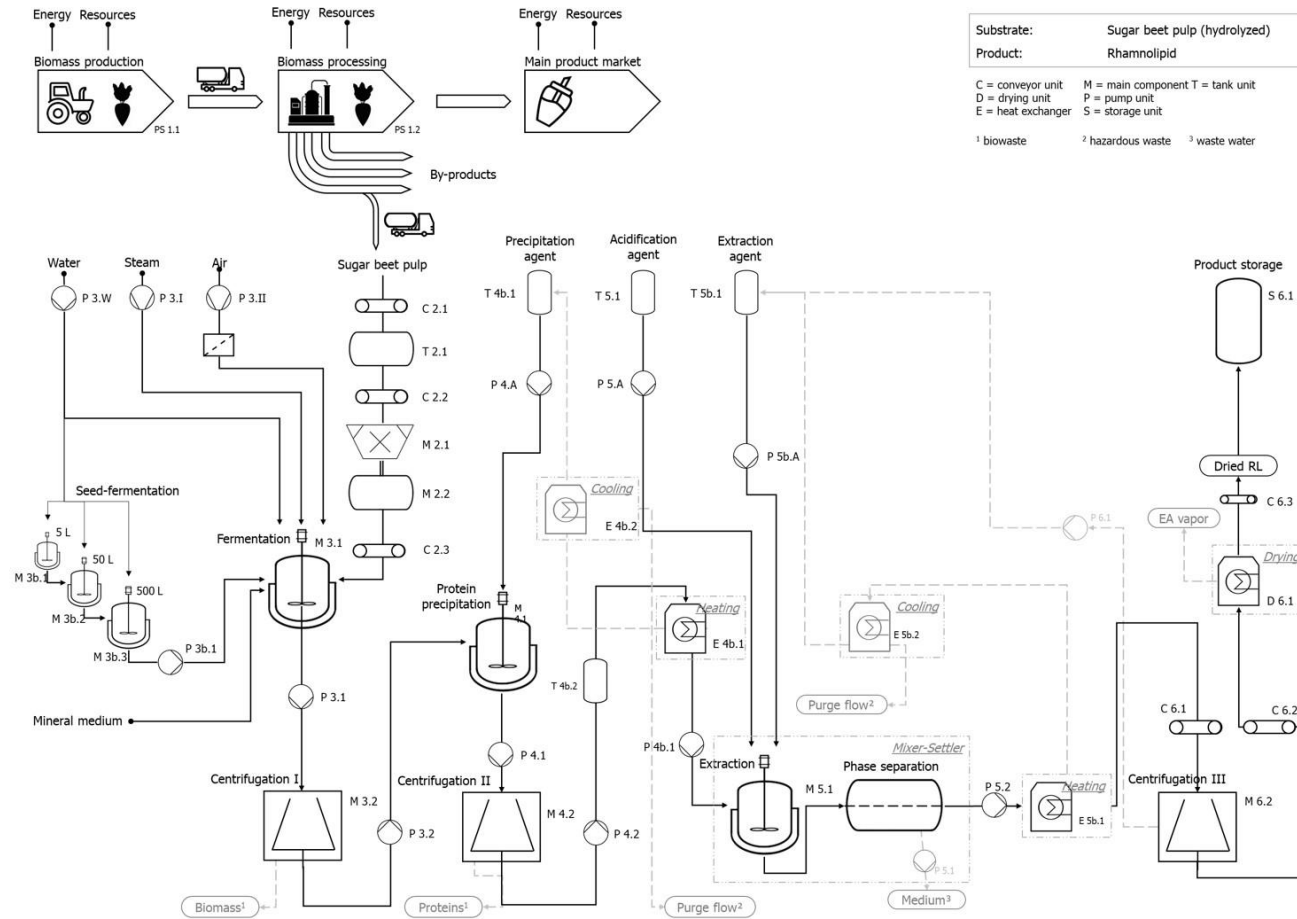

Supplementary Figure S1: Exemplary simplified illustration of the biosurfactant production process for the production of rhamnolipids with sugar beet pulp with description of specific process stages and modules.

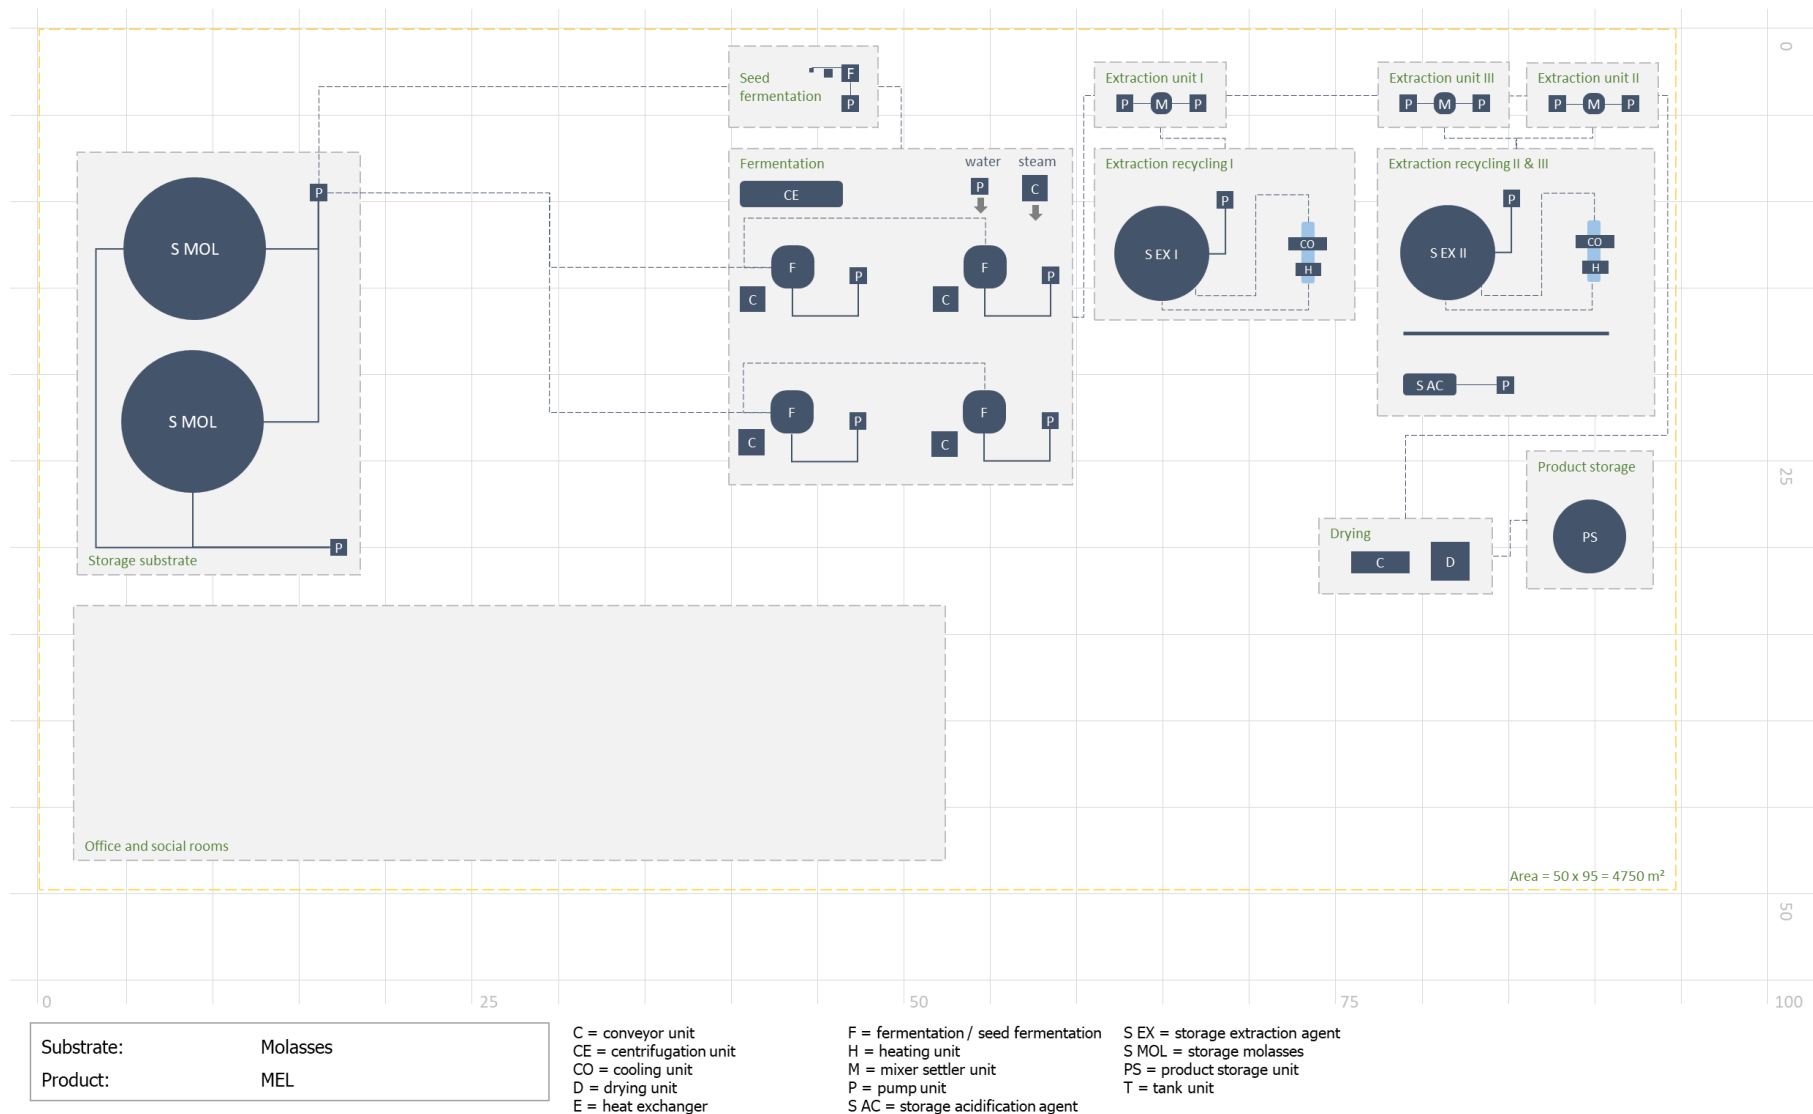

Supplementary Figure S2: Exemplary simplified illustration of the plant setup of mannosylerythritol lipids production with molasses with basic component description modules for a scaled graphical estimation of the required space.

## Allocation data

Supplementary Table S1: Underlying used data for the allocation in the sugar beet production and processing stage with data from Spoerri et al. (2014) and updated pricing of specific flows.

| Flow type |               | Main product and Co-products    | Amount<br>[kg/t <sub>sugar</sub> ] | Dry matter content<br>[%]  | Economic value               |        |            | Share of econ. value<br>[%] | Relevant for allocation | Source / comment                                                              |
|-----------|---------------|---------------------------------|------------------------------------|----------------------------|------------------------------|--------|------------|-----------------------------|-------------------------|-------------------------------------------------------------------------------|
|           |               |                                 |                                    |                            | [€/Mg]                       | [€/kg] | [€]        |                             |                         |                                                                               |
| in        | material flow | Sugar beet                      | 6,800.0                            |                            | 28.00                        | 0.03   |            |                             |                         | LBLUEN (2019), price of Nordzucker AG for 2020                                |
| out       | material flow | White granulated sugar          | 1,000.0                            | 1.00                       | 404.00                       | 0.40   | 404.00     | 64.26                       |                         | EU reference price, EU AGRI G4 (2020)                                         |
| out       | material flow | Beet soil                       | 750.2                              | 0.69                       | 0.00                         | 0.00   | 0.00       | 0.00                        |                         | Spoerri et al. (2014), option of spreading as fertilizer                      |
| out       | material flow | Sand/stones                     | 71.7                               | 1.00                       | 0.00                         | 0.00   | 0.00       | 0.00                        |                         | Spoerri et al. (2014), in principle option of usage as road building material |
| out       | material flow | Carbonatation lime              | 224.1                              | 0.65                       | 16.86                        | 0.02   | 3.78       | 0.60                        |                         | current average price from own market research                                |
| out       | material flow | Wet pulp                        | 4.3                                | 0.11                       | 0.00                         | 0.00   | 0.00       | 0.00                        |                         | Spoerri et al. (2014)                                                         |
| out       | material flow | Pressed pulp                    | 959.1                              | 0.26                       | 20.30                        | 0.02   | 19.47      | 3.10                        |                         | Spoerri et al. (2014); no essential pricing change                            |
| out       | material flow | Dried pulp w. molasses          | 132.0                              | 0.94                       | 200.00                       | 0.20   | 26.40      | 4.20                        | X                       | current average price from own market research                                |
| out       | material flow | Dried pulp w. vinasse & raffin. | 31.1                               | 0.88                       | 200.00                       | 0.20   | 6.22       | 0.99                        | X                       | current average price from own market research                                |
| out       | material flow | Molasses                        | 134.1                              | 0.80                       | 200.00                       | 0.20   | 26.82      | 4.27                        | X                       | current average price from own market research                                |
| out       | material flow | Betaine                         | 4.9                                | 0.55                       | 884.50                       | 0.88   | 4.33       | 0.69                        |                         | Spoerri et al. (2014); no essential pricing change                            |
| out       | material flow | Bioethanol                      | 151.5                              | 0.00                       | 900.00                       | 0.90   | 136.35     | 21.69                       |                         | assumption based on current pricing FOB Rotterdam (ca. 700 €/m <sup>3</sup> ) |
|           |               |                                 | <b>[kWh]</b>                       | <b>[kg<sub>SKE</sub>]*</b> | <b>[€/Mg<sub>SKE</sub>]*</b> |        | <b>[€]</b> |                             |                         |                                                                               |
| out       | energy flow   | Surplus electricity             | 57.2                               | 7.04                       | 50.00                        |        | 0.35       | 0.06                        |                         | current price from own market research for energy prices                      |
| out       | energy flow   | Surplus heat                    | 163.2                              | 20.07                      | 50.00                        |        | 1.00       | 0.16                        |                         | current price from own market research for energy prices                      |
|           |               | total                           |                                    |                            | 2,925.66                     |        | 628.73     | 100.00                      |                         |                                                                               |

\* SKE = coal unit

## ***Calculation of costs***

Following the calculation structure of Peters et al.<sup>1</sup>, it is possible to estimate the total capital investment cost and total production cost based on the equipment cost derived from a parts list for each process chain. As an example, the following Supplementary Table S1 provides an overview of considered equipment positions and the equipment cost per process stage. These calculations contain additional interim results on direct costs, indirect costs, working capital, manufacturing costs, and general expenses (see Supplementary Table S2). Some cost items included in the calculation were determined by separate calculations (e.g., depreciation, labor costs), other by the use of averaged or adjusted relative values for specific cost items (e.g., piping, legal expenses, maintenance) like it is displayed in Table S2. According to Peters et al. the used relative data is applicable to "ordinary chemical processes" and can vary depending on factors like the plant location, type of process, complexity of instrumentation, and company policies.

As an additional included position in Supplementary Table S2, the end-of-life (EoL) costs were estimated by the use of different calculation tools and literature based on own process-chain specific calculations of the necessary plant site layout (necessary dimensions of buildings and site for 15,000 kg<sub>product/a</sub>). The determined costs were added in the pricing under the assumption of an area use for 40 years.

---

<sup>1</sup> Peters, M. S., Timmerhaus, K. D., & West, R. E. (2003). *Plant Design and Economics for Chemical Engineers*: McGraw-Hill Education.

Supplementary Table S2: Underlying calculation positions for all considered process chains with calculation factors and the related reference data (based on and derived from data from Peters et al. (2003)); exemplary cost data for the MEL\_MOL process chain.

| field of cost                           | cost group / cost position               | calculation factor | exemplary data for MEL_MOL |                                                                                 | referred to / sum of                                         |                                                                                 |
|-----------------------------------------|------------------------------------------|--------------------|----------------------------|---------------------------------------------------------------------------------|--------------------------------------------------------------|---------------------------------------------------------------------------------|
|                                         |                                          | [% of reference]   | value                      | unit                                                                            |                                                              |                                                                                 |
| CAPITAL INVESTMENT COST (Investment)    | <b>direct cost</b>                       |                    |                            |                                                                                 |                                                              |                                                                                 |
|                                         | Purchased equipment                      | 28.6               | 3,359,706 €                |                                                                                 | own calculation                                              |                                                                                 |
|                                         | Purchased equipment installation         | 9.5                | 1,119,902 €                |                                                                                 | purchased equipment                                          |                                                                                 |
|                                         | Instrumentation and controls (installed) | 6.7                | 783,931 €                  |                                                                                 | purchased equipment                                          |                                                                                 |
|                                         | Piping (installed)                       | 4.8                | 559,951 €                  |                                                                                 | purchased equipment                                          |                                                                                 |
|                                         | Electrical systems (installed)           | 4.8                | 559,951 €                  |                                                                                 | purchased equipment                                          |                                                                                 |
|                                         | Buildings (including services)           | 3.8                | 447,961 €                  |                                                                                 | purchased equipment                                          |                                                                                 |
|                                         | Yard improvements                        | 1.9                | 223,980 €                  |                                                                                 | purchased equipment                                          |                                                                                 |
|                                         | Service facilities (installed)           | 9.5                | 1,119,902 €                |                                                                                 | purchased equipment                                          |                                                                                 |
|                                         | Land                                     | 1.0                | 111,990 €                  |                                                                                 | purchased equipment                                          |                                                                                 |
|                                         | <b>indirect cost</b>                     |                    |                            |                                                                                 |                                                              |                                                                                 |
|                                         | Engineering and supervision              | 9.5                | 1,119,902 €                |                                                                                 | purchased equipment                                          |                                                                                 |
|                                         | construction expenses                    | 9.5                | 1,119,902 €                |                                                                                 | purchased equipment                                          |                                                                                 |
|                                         | legal expenses                           | 1.9                | 223,980 €                  |                                                                                 | purchased equipment                                          |                                                                                 |
| contractor's fee                        | 3.8                                      | 447,961 €          |                            | purchased equipment                                                             |                                                              |                                                                                 |
| contingency                             | 4.8                                      | 559,951 €          |                            | purchased equipment                                                             |                                                              |                                                                                 |
| <b>fixed Capital Investment</b>         |                                          |                    | 11,758,970 €               |                                                                                 | direct cost + indirect cost                                  |                                                                                 |
| <b>working capital</b>                  | 15                                       |                    | 2,075,112 €                |                                                                                 | Fixed capital investment                                     |                                                                                 |
| <b>total capital investment</b>         |                                          |                    | 13,834,083 €               |                                                                                 | fixed capital investment + working capital                   |                                                                                 |
| depreciation time [y]                   |                                          | 10 y               |                            |                                                                                 |                                                              |                                                                                 |
| TOTAL PRODUCTION COST (Operation)       | <b>direct production cost</b>            |                    |                            | 1,738,630                                                                       |                                                              |                                                                                 |
|                                         | raw material                             | -                  | 327,759 €/a                |                                                                                 | own calculation                                              |                                                                                 |
|                                         | operating labor                          | -                  | 397,800 €/a                |                                                                                 | own calculation                                              |                                                                                 |
|                                         | direct supervisory and clerical labor    | 15                 | 59,670 €/a                 |                                                                                 | operating labor                                              |                                                                                 |
|                                         | maintenance and repairs                  | 6                  | 705,538 €/a                |                                                                                 | fixed capital investment                                     |                                                                                 |
|                                         | operating supplies                       | 0.75               | 88,192 €/a                 |                                                                                 | fixed capital investment                                     |                                                                                 |
|                                         | laboratory charges                       | 15                 | 59,670 €/a                 |                                                                                 | operating labor                                              |                                                                                 |
|                                         | patents and royalties                    | 2                  | 100,000 €/a                |                                                                                 | assumption                                                   |                                                                                 |
|                                         | <b>fixed charges</b>                     |                    |                            | 1,907,177 €/a                                                                   |                                                              |                                                                                 |
|                                         | linear depreciation cost                 | -                  | 1,383,408 €/a              |                                                                                 | own calculation from total capital investment                |                                                                                 |
|                                         | local taxes                              | 2.5                | 293,974 €/a                |                                                                                 | fixed capital investment                                     |                                                                                 |
|                                         | insurance                                | 0.5                | 58,795 €/a                 |                                                                                 | fixed capital investment                                     |                                                                                 |
|                                         | rent                                     | 8                  | 171,000 €/a                |                                                                                 | own calculations                                             |                                                                                 |
|                                         | <b>plant overhead cost</b>               | 60                 |                            | 697,805 €/a                                                                     |                                                              | operating labor, direct supervisory and clerical labor, maintenance and repairs |
| <b>Manufacturing cost</b>               | sum                                      |                    | 4,343,612 €/a              |                                                                                 | direct production cost + fixed charges + plant overhead cost |                                                                                 |
| <b>general expenses</b>                 |                                          |                    | 536,654 €/a                |                                                                                 |                                                              |                                                                                 |
| administrative costs                    | 20                                       | 232,602 €/a        |                            | operating labor, direct supervisory and clerical labor, maintenance and repairs |                                                              |                                                                                 |
| distribution and marketing costs        | 2                                        | 86,872 €/a         |                            | manufacturing cost                                                              |                                                              |                                                                                 |
| research and development costs          | 5                                        | 217,181 €/a        |                            | manufacturing cost                                                              |                                                              |                                                                                 |
| <b>total production cost</b>            | sum                                      |                    | 4,880,267 €/a              |                                                                                 | manufacturing cost + general expenses                        |                                                                                 |
| FOLLOWING COST                          | <b>following cost</b>                    |                    |                            |                                                                                 |                                                              |                                                                                 |
|                                         | total following costs (EoL)              | -                  | 1,073,402 €                |                                                                                 | own calculations                                             |                                                                                 |
|                                         | specific following costs (EoL)           | -                  | €/a                        |                                                                                 | own calculations                                             |                                                                                 |
|                                         | End of Life time [y]                     | 40 y               |                            |                                                                                 | assumption                                                   |                                                                                 |
| <b>total production cost + EoL cost</b> | sum                                      |                    | 4,907,102 €/a              |                                                                                 | total production cost + EoL cost                             |                                                                                 |
| PRICING                                 | <b>pricing</b>                           |                    |                            |                                                                                 |                                                              |                                                                                 |
|                                         | minimum price (incl. EoL cost)           | -                  |                            |                                                                                 | own calculations                                             |                                                                                 |

Derived from the data in Supplementary Table S2 the following figures show the shares of cost positions on total capital investment (TCI) and total production cost (TPC).

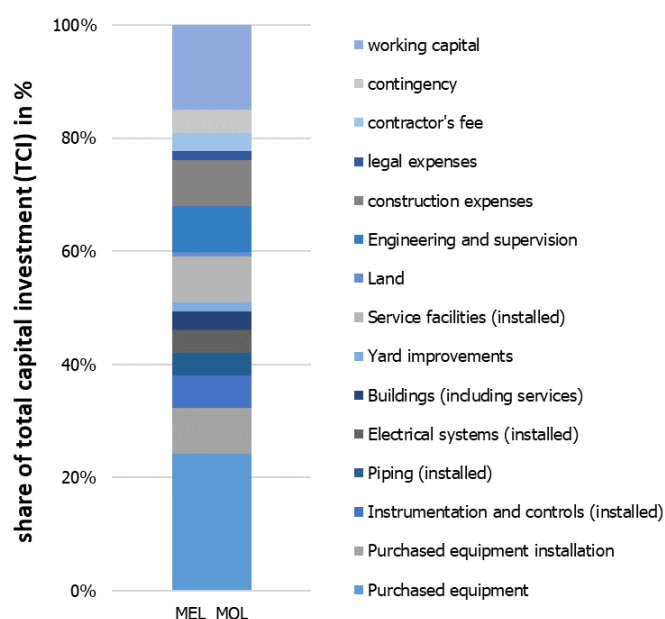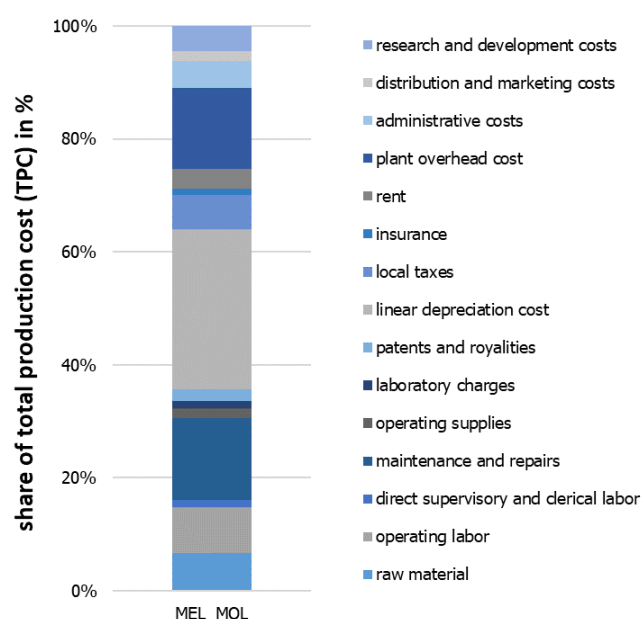

As shown in the following Supplementary Figure S3, the cost calculations of the products in the present study are based on a cost estimation for “total capital investment” and “total production cost” (including EoL cost). The total capital

investment (TCI) is mainly determined by the fixed capital investment (85%TCI), which is calculated by direct (59.9%TCI; e.g., equipment costs, building or electrical system costs) and indirect costs (25.1%TCI; e.g., engineering costs or legal expenses). The total production costs (TPC) comprise the dominating manufacturing costs (88.5%TPC; e.g., raw materials, laboratory charges, or linear depreciation costs), the general expenses (10.9%TPC; e.g., administrative or marketing costs), and EoL costs (< 1%TPC; EoL cost). The manufacturing costs are divided into direct production costs (32.9%TPC), plant overhead costs (14.2%TPC), and fixed charges (41.3%TPC, thereof 30.9% connected to the TCI). The percentage data are to be interpreted in the corresponding color context (green or yellow) and refer to the items marked with 100% in each case. Additional factors such as CO<sub>2</sub>-pricing, if necessary, margins, and others have to be added to calculate a selling price.

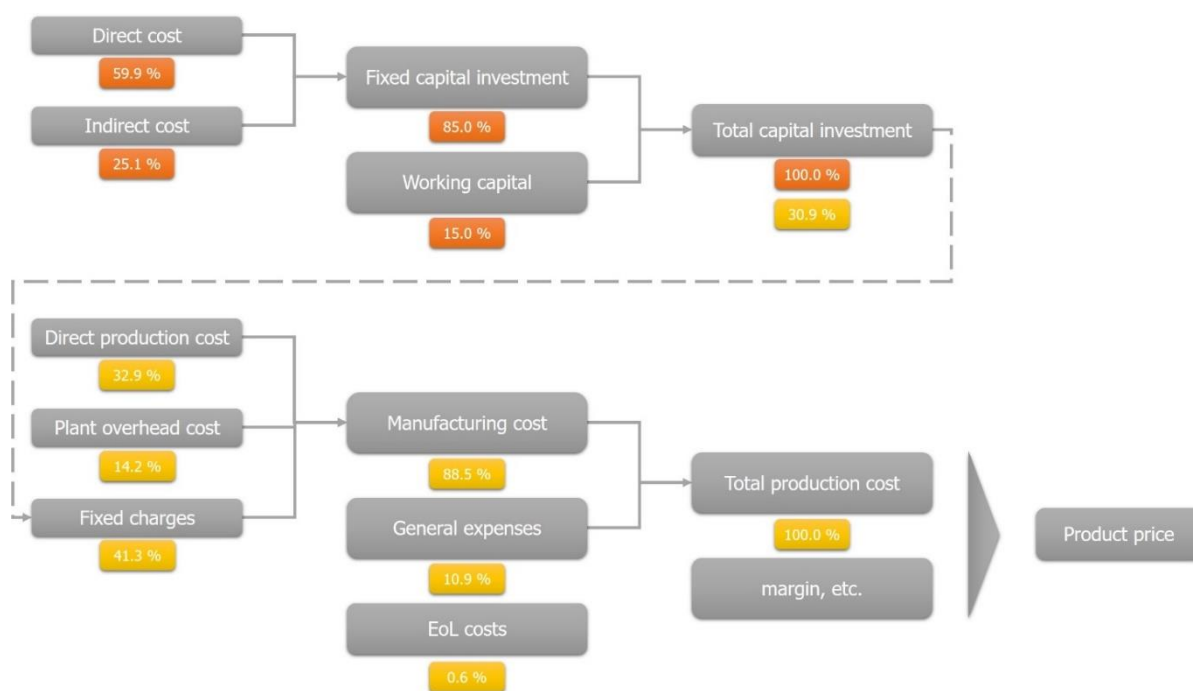

Supplementary Figure S3: Exemplary cost and pricing structure with relative shares of total capital investment (orange colored), total production cost (yellow colored), and the product price including margin, etc. for MEL production with SBP.



Supplementary Table S3: Underlying cost positions for equipment costs of the process chain MEL\_MOL for annual production of 15,000 kg product including costs per process stage, contained process modules and number of items.

| position no. <sup>1</sup> | process stage                                                  | process module                    | number of items | equipment cost per process stage <sup>2</sup> | source of equipment cost <sup>2</sup>                                                                                                                              |
|---------------------------|----------------------------------------------------------------|-----------------------------------|-----------------|-----------------------------------------------|--------------------------------------------------------------------------------------------------------------------------------------------------------------------|
|                           |                                                                |                                   | -               | €                                             | -                                                                                                                                                                  |
| PS 1.1                    | Sugar beet production and processing                           | -                                 | -               | covered by purchase price                     |                                                                                                                                                                    |
| PS 1.2                    |                                                                | -                                 | -               |                                               |                                                                                                                                                                    |
| P 2.1                     | Storage and preparation                                        | pump molasses                     | 1               | 266,538                                       | ● cost research via: alibaba.com<br>matche.com                                                                                                                     |
| T 2.1                     |                                                                | storage tank molasses             | 2               |                                               |                                                                                                                                                                    |
| P 2.2                     |                                                                | pump molasses                     | 1               |                                               |                                                                                                                                                                    |
| M 3.1                     | Fermentation                                                   | fermentation tank                 | 4               | 1,845,722                                     | ● cost calculations based on Knoll (2008) <sup>3</sup><br>● cost research via: alibaba.com<br>matche.com<br>mixerdirect.com<br>● information from project partners |
| P 3.1                     |                                                                | pump fermentation broth           | 4               |                                               |                                                                                                                                                                    |
| M 3.2                     |                                                                | centrifugation unit I             | 1               |                                               |                                                                                                                                                                    |
| P 3.2                     |                                                                | pump fermentation broth liquids   | 4               |                                               |                                                                                                                                                                    |
| P 3.W                     |                                                                | pump water                        | 1               |                                               |                                                                                                                                                                    |
| P 3.I                     |                                                                | compressor steam                  | 1               |                                               |                                                                                                                                                                    |
| P 3.II                    |                                                                | compressor air + filter           | 4               |                                               |                                                                                                                                                                    |
| -                         |                                                                | stirrer                           | 4               |                                               |                                                                                                                                                                    |
| -                         | membrane                                                       | 4                                 |                 |                                               |                                                                                                                                                                    |
| M 3b.1                    | Seed fermentation                                              | fermenter 5 L                     | 1               | 102,208                                       | ● cost research via: alibaba.com<br>matche.com<br>mixerdirect.com<br>● estimations                                                                                 |
| M 3b.2                    |                                                                | fermenter 50 L                    | 1               |                                               |                                                                                                                                                                    |
| M 3b.3                    |                                                                | fermenter 500 L                   | 1               |                                               |                                                                                                                                                                    |
| P 3b.1                    |                                                                | pump fermentation medium          | 1               |                                               |                                                                                                                                                                    |
| -                         | stirrer                                                        | 3                                 |                 |                                               |                                                                                                                                                                    |
| M4.1                      | Extraction 01                                                  | mixer settler unit I              | 1               | 207,670                                       | ● cost research via: alibaba.com<br>matche.com                                                                                                                     |
| P 4.1                     |                                                                | pump extraction agent recycling   | 1               |                                               |                                                                                                                                                                    |
| P 4.2                     |                                                                | pump broth residue                | 1               |                                               |                                                                                                                                                                    |
| T 4b.1                    | Extraction recycling I (included in Extraction 01)             | extraction agent tank             | 1               | 219,655                                       | ● cost research via: alibaba.com<br>eurolux-ag.com<br>● estimations                                                                                                |
| P 4b.A                    |                                                                | pump extraction agent             | 1               |                                               |                                                                                                                                                                    |
| E 4b.1                    |                                                                | extraction agent heating unit     | 1               |                                               |                                                                                                                                                                    |
| E 4b.2                    |                                                                | extraction agent cooling unit     | 1               |                                               |                                                                                                                                                                    |
| C 4b.1                    |                                                                | conveyor unit IV                  | 1               |                                               |                                                                                                                                                                    |
| T 4c.1                    | Extraction recycling II & III (included in Extraction 02 & 03) | extraction agent 2 tank           | 1               | 193,114                                       | ● cost research via: alibaba.com<br>matche.com<br>eurolux-ag.com<br>● estimations                                                                                  |
| T 4c.2                    |                                                                | acidification agent 2 tank        | 1               |                                               |                                                                                                                                                                    |
| P 4.A                     |                                                                | pump acidification agent          | 1               |                                               |                                                                                                                                                                    |
| P 4c.A1                   |                                                                | pump extraction agent             | 1               |                                               |                                                                                                                                                                    |
| P 4c.A2                   |                                                                | pump extraction agent             | 1               |                                               |                                                                                                                                                                    |
| E 4c.3                    |                                                                | extraction agent cooling unit II  | 1               |                                               |                                                                                                                                                                    |
| E 4c.4                    |                                                                | extraction agent heating unit III | 1               |                                               |                                                                                                                                                                    |
| M 4.2                     | Extraction 02                                                  | mixer settler unit II             | 1               | 202,000                                       | ● cost research via: alibaba.com<br>matche.com                                                                                                                     |
| P 4.3                     |                                                                | pump extraction agent recycling   | 1               |                                               |                                                                                                                                                                    |
| P 4.4                     |                                                                | pump broth residue                | 1               |                                               |                                                                                                                                                                    |
| M 4.3                     | Extraction 03                                                  | mixer settler unit III            | 1               | 202,000                                       | ● cost research via: alibaba.com<br>matche.com                                                                                                                     |
| P 4.5                     |                                                                | pump extraction agent recycling   | 1               |                                               |                                                                                                                                                                    |
| P 4.6                     |                                                                | pump broth residue                | 1               |                                               |                                                                                                                                                                    |
| M 5.1                     | Final conditioning                                             | centrifugation unit II            | 1               | 120,800                                       | ● cost research via: matche.com<br>● estimations                                                                                                                   |
| D 5.1                     |                                                                | drying unit                       | 1               |                                               |                                                                                                                                                                    |
| C 5.1                     |                                                                | conveyor unit VII                 | 1               |                                               |                                                                                                                                                                    |
| C 5.2                     |                                                                | conveyor unit VIII                | 1               |                                               |                                                                                                                                                                    |
| S 5.1                     |                                                                | product storage                   | 1               |                                               |                                                                                                                                                                    |
|                           |                                                                | <b>total</b>                      |                 | <b>3,359,706</b>                              |                                                                                                                                                                    |

<sup>1</sup> related to flow chart

<sup>2</sup> data status: 2021

<sup>3</sup> inflation included

## Results LCA Contributions

Supplementary Table S4/1: LCIA results for the most contributing process modules and flows (per impact category) of RL production in the context of the six most contributing impact categories (to total impact) per considered process chain; share of impact categories impact on total impact per process chain.

| impact category                                                      | share of impact category on total impact (range of process chains) | RL_MOL                                   |                                                                 |                                             |                                                                           | RL_SBP                                   |                                                                 |                                             |                                                                           |
|----------------------------------------------------------------------|--------------------------------------------------------------------|------------------------------------------|-----------------------------------------------------------------|---------------------------------------------|---------------------------------------------------------------------------|------------------------------------------|-----------------------------------------------------------------|---------------------------------------------|---------------------------------------------------------------------------|
|                                                                      |                                                                    | share of impact category on total impact | share of contributing flow on total impact of specific category | mainly responsible process module of origin | share of contributing process module on total impact of specific category | share of impact category on total impact | share of contributing flow on total impact of specific category | mainly responsible process module of origin | share of contributing process module on total impact of specific category |
|                                                                      |                                                                    | %                                        | %                                                               |                                             | %                                                                         | %                                        | %                                                               |                                             | %                                                                         |
| ecotoxicity freshwater - total                                       | 21-30 %                                                            | 22.3                                     |                                                                 |                                             |                                                                           | 20.8                                     |                                                                 |                                             |                                                                           |
| <i>most contributing flows (overall)</i>                             |                                                                    | <i>chloride</i>                          | 26.8                                                            | treatment of hazardous waste [PAR]          | 9.3                                                                       | <i>chloride</i>                          | 27.8                                                            | treatment of hazardous waste [PAR]          | 11.5                                                                      |
|                                                                      |                                                                    | <i>sulphur</i>                           | 22.7                                                            | pottasium chloride production [SBPP]        | 21.5                                                                      | <i>hydrogen sulphide</i>                 | 18.2                                                            | treatment of biowaste [FER]                 | 11.3                                                                      |
| resource use, fossils                                                | 19-26 %                                                            | 24.7                                     |                                                                 |                                             |                                                                           | 25.8                                     |                                                                 |                                             |                                                                           |
| <i>most contributing flows (overall)</i>                             |                                                                    | <i>gas, natural, in ground</i>           | 30.7                                                            | acetone production [PAR]                    | 25.8                                                                      | <i>gas, natural, in ground</i>           | 31.6                                                            | acetone production [PAR]                    | 28.0                                                                      |
|                                                                      |                                                                    | <i>crude oil ecoinvent</i>               | 26.3                                                            | acetone production [PAR]                    | 19.3                                                                      | <i>crude oil ecoinvent</i>               | 26.4                                                            | acetone production [PAR]                    | 20.9                                                                      |
| climate change - total                                               | 9-11 %                                                             | 10.5                                     |                                                                 |                                             |                                                                           | 10.9                                     |                                                                 |                                             |                                                                           |
| <i>most contributing flows (overall)</i>                             |                                                                    | <i>carbon dioxide</i>                    | 84.2                                                            | acetone production [PAR]                    | 26.3                                                                      | <i>carbon dioxide</i>                    | 84.6                                                            | acetone production [PAR]                    | 28.7                                                                      |
|                                                                      |                                                                    | <i>methane</i>                           | 13.1                                                            | acetone production [PAR]                    | 9.2                                                                       | <i>methane</i>                           | 13.5                                                            | acetone production [PAR]                    | 10.0                                                                      |
| eutrophication, freshwater                                           | 5-6 %                                                              | 5.6                                      |                                                                 |                                             |                                                                           | 5.1                                      |                                                                 |                                             |                                                                           |
| <i>most contributing flows (overall)</i>                             |                                                                    | <i>phosphate</i>                         | 48.5                                                            | treatment of hazardous waste [PAR]          | 18.7                                                                      | <i>phosphate</i>                         | 53.2                                                            | treatment of hazardous waste [PAR]          | 23.1                                                                      |
|                                                                      |                                                                    | <i>phosphorus</i>                        | 39.4                                                            | acetone production [PAR]                    | 18.6                                                                      | <i>phosphorus</i>                        | 37.0                                                            | acetone production [PAR]                    | 22.8                                                                      |
| acidification                                                        | 4-6 %                                                              | 5.8                                      |                                                                 |                                             |                                                                           | 6.0                                      |                                                                 |                                             |                                                                           |
| <i>most contributing flows (overall)</i>                             |                                                                    | <i>sulphur dioxide</i>                   | 39.5                                                            | acetone production [PAR]                    | 34.9                                                                      | <i>sulphur dioxide</i>                   | 41.9                                                            | acetone production [PAR]                    | 38.0                                                                      |
|                                                                      |                                                                    | <i>nitrogen oxides</i>                   | 15.1                                                            | acetone production [PAR]                    | 13.2                                                                      | <i>nitrogen oxides</i>                   | 15.9                                                            | acetone production [PAR]                    | 14.4                                                                      |
| resource use, minerals and metals                                    | 3-6 %                                                              | 3.0                                      |                                                                 |                                             |                                                                           | 2.8                                      |                                                                 |                                             |                                                                           |
| <i>most contributing flows (overall)</i>                             |                                                                    | <i>tellurium</i>                         | 47.4                                                            | ethyl acetate production [EX]               | 28.7                                                                      | <i>tellurium</i>                         | 44.9                                                            | ethyl acetate production [EX]               | 21.9                                                                      |
|                                                                      |                                                                    | <i>chromium</i>                          | 17.6                                                            | steel production [FER]                      | 5.1                                                                       | <i>chromium</i>                          | 22.5                                                            | steel production [FER]                      | 5.8                                                                       |
| share of six impact categories on total impact                       |                                                                    | 71.9                                     |                                                                 |                                             |                                                                           | 71.5                                     |                                                                 |                                             |                                                                           |
| average share of process module on total impact of specific category |                                                                    |                                          |                                                                 |                                             | 19.2                                                                      |                                          |                                                                 |                                             | 19.7                                                                      |

EX = Extraction; EX 01 = Extraction #1; FER = Fermentation; PAR = Precipitation Agent Recovery; SBPP = Sugar beet production and processing

Supplementary Table S4/2: LCIA results for the most contributing process modules and flows (per impact category) of MEL production in the context of the six most contributing impact categories (to total impact) per considered process chain; share of impact categories impact on total impact per process chain.

| impact category                                                      | share of impact category on total impact (range of process chains) | MEL_MOL                                  |                                                                 |                                             |                                                                           | MEL_SBP                                  |                                                                 |                                             |                                                                           |
|----------------------------------------------------------------------|--------------------------------------------------------------------|------------------------------------------|-----------------------------------------------------------------|---------------------------------------------|---------------------------------------------------------------------------|------------------------------------------|-----------------------------------------------------------------|---------------------------------------------|---------------------------------------------------------------------------|
|                                                                      |                                                                    | share of impact category on total impact | share of contributing flow on total impact of specific category | mainly responsible process module of origin | share of contributing process module on total impact of specific category | share of impact category on total impact | share of contributing flow on total impact of specific category | mainly responsible process module of origin | share of contributing process module on total impact of specific category |
|                                                                      |                                                                    | %                                        | %                                                               |                                             | %                                                                         | %                                        | %                                                               |                                             | %                                                                         |
| ecotoxicity freshwater - total                                       | 21-30 %                                                            | 29.5                                     |                                                                 |                                             |                                                                           | 28.5                                     |                                                                 |                                             |                                                                           |
| <i>most contributing flows (overall)</i>                             |                                                                    | <i>sulphur</i>                           | 21.1                                                            | pottasium chloride production [SBPP]        | 19.6                                                                      | <i>chloride</i>                          | 19.9                                                            | treatment of hazardous waste [EX 01]        | 3.8                                                                       |
|                                                                      |                                                                    | <i>chloride</i>                          | 20.9                                                            | pottasium chloride production [SBPP]        | 4.9                                                                       | <i>aluminium</i>                         | 19.2                                                            | ethyl acetate production [EX 01]            | 11.4                                                                      |
| resource use, fossils                                                | 19-26 %                                                            | 18.8                                     |                                                                 |                                             |                                                                           | 19.5                                     |                                                                 |                                             |                                                                           |
| <i>most contributing flows (overall)</i>                             |                                                                    | <i>crude oil ecoinvent</i>               | 21.9                                                            | ethyl acetate production [EX 01]            | 13.8                                                                      | <i>crude oil ecoinvent</i>               | 22.1                                                            | ethyl acetate production [EX 01]            | 14.6                                                                      |
|                                                                      |                                                                    | <i>natural gas</i>                       | 19.3                                                            | compressed air supply [FER]                 | 7.3                                                                       | <i>natural gas</i>                       | 16.8                                                            | compressed air supply [FER]                 | 8.0                                                                       |
| climate change - total                                               | 9-11 %                                                             | 8.5                                      |                                                                 |                                             |                                                                           | 8.6                                      |                                                                 |                                             |                                                                           |
| <i>most contributing flows (overall)</i>                             |                                                                    | <i>carbon dioxide</i>                    | 89.0                                                            | compressed air supply [FER]                 | 27.5                                                                      | <i>carbon dioxide</i>                    | 89.8                                                            | compressed air supply [FER]                 | 30.9                                                                      |
|                                                                      |                                                                    | <i>methane</i>                           | 7.9                                                             | ethyl acetate production [EX 01]            | 4.0                                                                       | <i>methane</i>                           | 8.2                                                             | ethyl acetate production [EX 01]            | 4.3                                                                       |
| eutrophication, freshwater                                           | 5-6 %                                                              | 6.4                                      |                                                                 |                                             |                                                                           | 6.1                                      |                                                                 |                                             |                                                                           |
| <i>most contributing flows (overall)</i>                             |                                                                    | <i>phosphate (longterm)</i>              | 57.9                                                            | ethyl acetate production [EX 01]            | 16.6                                                                      | <i>phosphate [longterm]</i>              | 64.9                                                            | ethyl acetate production [EX 01]            | 36.4                                                                      |
|                                                                      |                                                                    | <i>phosphate</i>                         | 23.4                                                            | ethyl acetate production [EX 01]            | 16.6                                                                      | <i>phosphate</i>                         | 25.3                                                            | ethyl acetate production [EX 01]            | 18.8                                                                      |
| acidification                                                        | 4-6 %                                                              | 4.3                                      |                                                                 |                                             |                                                                           | 4.4                                      |                                                                 |                                             |                                                                           |
| <i>most contributing flows (overall)</i>                             |                                                                    | <i>nitrogen oxides</i>                   | 17.8                                                            | compressed air supply [FER]                 | 7.2                                                                       | <i>nitrogen oxides</i>                   | 17.8                                                            | compressed air supply [FER]                 | 8.0                                                                       |
|                                                                      |                                                                    | <i>sulphur dioxide</i>                   | 16.8                                                            | compressed air supply [FER]                 | 9.9                                                                       | <i>sulphur dioxide</i>                   | 17.8                                                            | compressed air supply [FER]                 | 11.1                                                                      |
| resource use, minerals and metals                                    | 3-6 %                                                              | 5.8                                      |                                                                 |                                             |                                                                           | 6.2                                      |                                                                 |                                             |                                                                           |
| <i>most contributing flows (overall)</i>                             |                                                                    | <i>tellurium</i>                         | 55.8                                                            | ethyl acetate production [EX 01]            | 38.5                                                                      | <i>tellurium</i>                         | 56.2                                                            | ethyl acetate production [EX 01]            | 39.0                                                                      |
|                                                                      |                                                                    | <i>gold</i>                              | 13.9                                                            | ethyl acetate production [EX 01]            | 9.7                                                                       | <i>gold</i>                              | 13.9                                                            | ethyl acetate production [EX 01]            | 9.8                                                                       |
| share of six impact categories on total impact                       |                                                                    | 73.3                                     |                                                                 |                                             |                                                                           | 73.3                                     |                                                                 |                                             |                                                                           |
| average share of process module on total impact of specific category |                                                                    |                                          |                                                                 |                                             | 14.6                                                                      |                                          |                                                                 |                                             | 16.4                                                                      |

EX = Extraction; EX 01 = Extraction #1; FER = Fermentation; PAR = Precipitation Agent Recovery; SBPP = Sugar beet production and processing

Supplementary Table S5/1: Cost data sources of material and services for the biosurfactants production cost analysis and S-LCA.

|                        | substrate                   | price      |              | unit   | year | supplier                                 | source                                                                                                                                                                                                |
|------------------------|-----------------------------|------------|--------------|--------|------|------------------------------------------|-------------------------------------------------------------------------------------------------------------------------------------------------------------------------------------------------------|
|                        |                             | net<br>[€] | gross<br>[€] |        |      |                                          |                                                                                                                                                                                                       |
| <b>molasses</b>        |                             |            |              |        |      |                                          |                                                                                                                                                                                                       |
| 1                      | molasses                    | 335.00     | 398.65       | [€/Mg] | 2018 | Dieckmann Technik GmbH                   | <a href="http://www.dootec.de/melasse-ibc">http://www.dootec.de/melasse-ibc</a>                                                                                                                       |
| 2                      | molasses                    | 270.00     | 321.30       | [€/Mg] | 2018 | Dieckmann Technik GmbH                   | <a href="http://www.dootec.de/melasse-ibc">http://www.dootec.de/melasse-ibc</a>                                                                                                                       |
| 3                      | molasses                    | 209.00     | 248.71       | [€/Mg] | 2017 | Blatterspiel Agrarhandel e.K.            | <a href="https://www.rh-agrarhandel.de/">https://www.rh-agrarhandel.de/</a>                                                                                                                           |
| 4                      | molasses                    | 199.00     | 236.81       | [€/Mg] | 2017 | Blatterspiel Agrarhandel e.K.            | <a href="https://www.rh-agrarhandel.de/">https://www.rh-agrarhandel.de/</a>                                                                                                                           |
| 5                      | Beet molasses               | 128.05     | 152.38       | [€/Mg] | 2011 | -                                        | Maung, T.A. et al. 2011. The economic feasibility of sugar beet biofuel production in central North Dakota in Biomass and Bioenergy Volume 35. Issue 9. October 2011. Pages 3737-3747                 |
| 6                      | molasses                    | 242.14     | 288.14       | [€/Mg] | 2017 | MBR Thurgau AG                           | <a href="http://www.maschinenring.ch">www.maschinenring.ch</a>                                                                                                                                        |
| 7                      | beet molasses 42 %          | 158.25     | 188.32       | [€/Mg] | 2011 | DMH Agrar GmbH                           | <a href="https://www.deutsche-melasse.de/">https://www.deutsche-melasse.de/</a>                                                                                                                       |
| 8                      | beet molasses 42 %          | 174.53     | 207.69       | [€/Mg] | 2014 | DMH Agrar GmbH                           | <a href="https://www.deutsche-melasse.de/">https://www.deutsche-melasse.de/</a>                                                                                                                       |
| 9                      | beet molasses 42 %          | 152.77     | 181.80       | [€/Mg] | 2015 | DMH Agrar GmbH                           | <a href="https://www.deutsche-melasse.de/">https://www.deutsche-melasse.de/</a>                                                                                                                       |
| ∅                      |                             | 207.64     | 247.09       | [€/Mg] |      |                                          |                                                                                                                                                                                                       |
| used                   | molasses                    | 200.00     |              | [€/Mg] |      |                                          |                                                                                                                                                                                                       |
| <b>sugar beet pulp</b> |                             |            |              |        |      |                                          |                                                                                                                                                                                                       |
| 1                      | sugar beet pulp             | 147.00     | 174.93       | [€/Mg] | 2017 | Rheinischen Warenbörse e.V.              | <a href="https://www.rheinische-warenboerse.de/">https://www.rheinische-warenboerse.de/</a>                                                                                                           |
| 2                      | sugar beet pulp             | 260.47     | 309.96       | [€/Mg] | 2012 | -                                        | Losand, B. (2012) Sächsischer Futtertag 2012, Protein aus Nebenprodukten                                                                                                                              |
| 3                      | dry sugar beet pulp         | 172.60     | 205.39       | [€/Mg] | 2017 | Landwirtschaftskammer Schleswig-Holstein | <a href="http://www.lksh.de/landwirtschaft/betriebswirtschaft-beratung/markt/futtermittel/Preisliste">http://www.lksh.de/landwirtschaft/betriebswirtschaft-beratung/markt/futtermittel/Preisliste</a> |
| 4                      | dry sugar beet pulp pellets | 170.00     | 202.30       | [€/Mg] | 2018 | WVZ e.V.                                 | <a href="https://www.zuckerverbaende.de">https://www.zuckerverbaende.de</a>                                                                                                                           |
| 5                      | dry sugar beet pulp         | 220.00     | 261.80       | [€/Mg] | 2017 | DMH Agrar GmbH                           | <a href="https://www.deutsche-melasse.de/">https://www.deutsche-melasse.de/</a>                                                                                                                       |
| 6                      | dry sugar beet pulp         | 147.00     | 174.93       | [€/Mg] | 2017 | DMH Agrar GmbH                           | <a href="https://www.deutsche-melasse.de/">https://www.deutsche-melasse.de/</a>                                                                                                                       |
| ∅                      |                             | 186.18     | 221.55       | [€/Mg] |      |                                          |                                                                                                                                                                                                       |
| used                   | sugar beet pulp             | 200.00     |              | [€/Mg] |      |                                          |                                                                                                                                                                                                       |

Supplementary Table S5/2: Cost data sources of material and services for the biosurfactants production cost analysis and S-LCA.

|                              | substrate        | price      |              | unit                | year | supplier                                          | source                                                                                                                                                                                                                                                                                                                                                                                                                                              |
|------------------------------|------------------|------------|--------------|---------------------|------|---------------------------------------------------|-----------------------------------------------------------------------------------------------------------------------------------------------------------------------------------------------------------------------------------------------------------------------------------------------------------------------------------------------------------------------------------------------------------------------------------------------------|
|                              |                  | net<br>[€] | gross<br>[€] |                     |      |                                                   |                                                                                                                                                                                                                                                                                                                                                                                                                                                     |
| <b>water</b>                 |                  |            |              |                     |      |                                                   |                                                                                                                                                                                                                                                                                                                                                                                                                                                     |
| 1                            | tap water        | 1.68       | 1.80         | [€/m <sup>3</sup> ] | 2018 | Gelsenwasser AG                                   | <a href="https://www.gelsenwasser.de/wasser/preise/">https://www.gelsenwasser.de/wasser/preise/</a>                                                                                                                                                                                                                                                                                                                                                 |
| 2                            | tap water        | 1.84       | 1.97         | [€/m <sup>3</sup> ] | 2018 | Gelsenwasser AG                                   | <a href="https://www.gelsenwasser.de/wasser/preise/">https://www.gelsenwasser.de/wasser/preise/</a>                                                                                                                                                                                                                                                                                                                                                 |
| 3                            | tap water        | 1.83       | 1.96         | [€/m <sup>3</sup> ] | 2018 | Stadtwerke Konstanz GmbH                          | <a href="https://www.stadtwerke-konstanz.de/energie-und-wasser/trinkwasser/allgemeiner-wassertarif/">https://www.stadtwerke-konstanz.de/energie-und-wasser/trinkwasser/allgemeiner-wassertarif/</a>                                                                                                                                                                                                                                                 |
| 4                            | tap water        | 1.78       | 1.91         | [€/m <sup>3</sup> ] | 2018 | BS ENERGY, Braunschweiger Versorgungs-AG & Co. KG | <a href="https://www.bs-energy.de/geschaeftskunden/service/wasser/">https://www.bs-energy.de/geschaeftskunden/service/wasser/</a>                                                                                                                                                                                                                                                                                                                   |
| 5                            | tap water        | 1.69       | 1.81         | [€/m <sup>3</sup> ] | 2018 | Berliner Wasserbetriebe                           | <a href="http://www.bwb.de/content/language1/html/204.php">http://www.bwb.de/content/language1/html/204.php</a>                                                                                                                                                                                                                                                                                                                                     |
| 6                            | tap water        | 1.53       | 1.64         | [€/m <sup>3</sup> ] | 2018 | Stadtwerke Rosenheim GmbH & Co. KG                | <a href="https://www.swro.de/versorgung/wasser/preise.html">https://www.swro.de/versorgung/wasser/preise.html</a>                                                                                                                                                                                                                                                                                                                                   |
| 7                            | tap water        | 1.74       | 1.86         | [€/m <sup>3</sup> ] | 2018 | Stadtwerke Kiel AG                                | <a href="https://www.stadtwerke-kiel.de/swk/de/produkte/privatkunden/wasser/tarife/wassertarife.jsp">https://www.stadtwerke-kiel.de/swk/de/produkte/privatkunden/wasser/tarife/wassertarife.jsp</a>                                                                                                                                                                                                                                                 |
| 8                            | tap water        | 1.25       | 1.34         | [€/m <sup>3</sup> ] | 2018 | Stadtwerke Emden GmbH                             | <a href="https://stadtwerke-emden.de/wasser/preisuebersicht/">https://stadtwerke-emden.de/wasser/preisuebersicht/</a>                                                                                                                                                                                                                                                                                                                               |
| 9                            | tap water        | 2.08       | 2.23         | [€/m <sup>3</sup> ] | 2018 | MVV Energie AG                                    | <a href="https://www.mvv.de/energie/gewerbe/wasser/preise-bedingungen/">https://www.mvv.de/energie/gewerbe/wasser/preise-bedingungen/</a>                                                                                                                                                                                                                                                                                                           |
| 10                           | tap water        | 2.00       | 2.14         | [€/m <sup>3</sup> ] | 2018 | Aschaffenburg Versorgungs-GmbH                    | <a href="http://www.stwab.de/Energie-Wasser/Wasser/Wassertarife/">http://www.stwab.de/Energie-Wasser/Wasser/Wassertarife/</a>                                                                                                                                                                                                                                                                                                                       |
| ∅                            |                  | 1.74       | 1.87         | [€/m <sup>3</sup> ] |      |                                                   |                                                                                                                                                                                                                                                                                                                                                                                                                                                     |
| used                         | tap water        | 2.00       |              | [€/m <sup>3</sup> ] |      |                                                   |                                                                                                                                                                                                                                                                                                                                                                                                                                                     |
| <b>Seed Fermenter Medium</b> |                  |            |              |                     |      |                                                   |                                                                                                                                                                                                                                                                                                                                                                                                                                                     |
| 1                            | fermenter medium | 20.00      | 23.8         | [€/L]               | 2013 | -                                                 | Andrew, W. (2013). Pharmaceutical Manufacturing Encyclopedia (3rd ed.): Elsevier Science.                                                                                                                                                                                                                                                                                                                                                           |
| ∅                            |                  | 20.00      | 23.80        | [€/L]               |      |                                                   |                                                                                                                                                                                                                                                                                                                                                                                                                                                     |
| used                         | fermenter medium | 20.00      |              | [€/L]               |      |                                                   |                                                                                                                                                                                                                                                                                                                                                                                                                                                     |
| <b>precipitation agent</b>   |                  |            |              |                     |      |                                                   |                                                                                                                                                                                                                                                                                                                                                                                                                                                     |
| 1                            | acetone          | 1,300.00   | 1,547.00     | [€/Mg]              | 2019 | alibaba.com                                       | <a href="https://german.alibaba.com/product-detail/high-purity-98-acetone-ch3coch3-propanone-c3h6o-industrial-grade-for-plastic-rubber-fiber-leather-grease-60662133352.html?spm=a2700.8699010.normalList.80.2bd54b21yb8Ugd">https://german.alibaba.com/product-detail/high-purity-98-acetone-ch3coch3-propanone-c3h6o-industrial-grade-for-plastic-rubber-fiber-leather-grease-60662133352.html?spm=a2700.8699010.normalList.80.2bd54b21yb8Ugd</a> |
| 2                            | acetone          | 2,004.86   | 2,385.78     | [€/Mg]              | 2019 | Dr. Felix Jäger Chemikalienhandel                 | chemical portal price listing 02/2019                                                                                                                                                                                                                                                                                                                                                                                                               |
| 3                            | acetone          | 1,720.00   | 2,046.80     | [€/Mg]              | 2021 | Dr. Felix Jäger Chemikalienhandel                 | <a href="https://www.chemikalienportal.de/loesemittel/acetone-1/acetone.html">https://www.chemikalienportal.de/loesemittel/acetone-1/acetone.html</a>                                                                                                                                                                                                                                                                                               |
| 4                            | acetone          | 1,225.00   | 1,457.75     | [€/Mg]              | 2019 | PCC Trade & Services GmbH                         | <a href="https://distripark.de/acetone-chem-rein-dimethylketon-propan-2-on-800-kg-ibc">https://distripark.de/acetone-chem-rein-dimethylketon-propan-2-on-800-kg-ibc</a>                                                                                                                                                                                                                                                                             |
| 5                            | acetone          | 880.00     | 1,047.20     | [€/Mg]              | 2019 | guidechem.com                                     | <a href="https://www.guidechem.com/trade/pdetail3614485.html">https://www.guidechem.com/trade/pdetail3614485.html</a>                                                                                                                                                                                                                                                                                                                               |
| 6                            | acetone          | 1,760.00   | 2,094.40     | [€/Mg]              | 2019 | guidechem.com                                     | <a href="https://www.guidechem.com/trade/pdetail3218893.html">https://www.guidechem.com/trade/pdetail3218893.html</a>                                                                                                                                                                                                                                                                                                                               |
| ∅                            |                  | 1481.64    | 1763.16      |                     |      |                                                   |                                                                                                                                                                                                                                                                                                                                                                                                                                                     |
| used                         | acetone          | 1,200.00   |              | [€/Mg]              |      |                                                   |                                                                                                                                                                                                                                                                                                                                                                                                                                                     |

Supplementary Table S5/3: Cost data sources of material and services for the biosurfactants production cost analysis and S-LCA.

|                            | substrate           | price      |              | unit   | year | supplier                          | source                                                                                                                                                                                                                                                                                                                                                      |
|----------------------------|---------------------|------------|--------------|--------|------|-----------------------------------|-------------------------------------------------------------------------------------------------------------------------------------------------------------------------------------------------------------------------------------------------------------------------------------------------------------------------------------------------------------|
|                            |                     | net<br>[€] | gross<br>[€] |        |      |                                   |                                                                                                                                                                                                                                                                                                                                                             |
| <b>acidification agent</b> |                     |            |              |        |      |                                   |                                                                                                                                                                                                                                                                                                                                                             |
| 1                          | sulphuric acid 96 % | 421.40     | 501.47       | [€/Mg] | 2020 | PCC Trade & Services GmbH         | <a href="https://distripark.de/schwefelsaure-96-nettogewicht-1400-kg">https://distripark.de/schwefelsaure-96-nettogewicht-1400-kg</a>                                                                                                                                                                                                                       |
| 2                          | sulphuric acid 96 % | 380.38     | 452.65       | [€/Mg] | 2019 | JOKORA GmbH                       | <a href="https://www.jokora.de/biogasanlagen/schwefelsaeure/schwefelsaeure-96-tech-1300-kg-container">https://www.jokora.de/biogasanlagen/schwefelsaeure/schwefelsaeure-96-tech-1300-kg-container</a>                                                                                                                                                       |
| 3                          | sulphuric acid 96 % | 274.69     | 326.88       | [€/Mg] | 2019 | JOKORA GmbH                       | <a href="https://www.jokora.de/biogasanlagen/schwefelsaeure/schwefelsaeure-96-tech-1300-kg-container">https://www.jokora.de/biogasanlagen/schwefelsaeure/schwefelsaeure-96-tech-1300-kg-container</a>                                                                                                                                                       |
| 4                          | sulphuric acid 96 % | 264.00     | 314.16       | [€/Mg] | 2020 | alibaba.com                       | <a href="https://german.alibaba.com/product-detail/un1830-sulfuric-acid-best-price-ibc-tank-jerrycan-60786047727.html?spm=a2700.8699010.normalList.19.4b7d24918g3g4w">https://german.alibaba.com/product-detail/un1830-sulfuric-acid-best-price-ibc-tank-jerrycan-60786047727.html?spm=a2700.8699010.normalList.19.4b7d24918g3g4w</a>                       |
| 5                          | sulphuric acid 96 % | 347.60     | 413.644      | [€/Mg] | 2020 | alibaba.com                       | <a href="https://german.alibaba.com/product-detail/chciw-h2so4-96-cas-9002-84-0-schwefels-ure-96-60667342302.html?spm=a2700.galleryofferlist.normalList.1.5922121885DKou&amp;sp">https://german.alibaba.com/product-detail/chciw-h2so4-96-cas-9002-84-0-schwefels-ure-96-60667342302.html?spm=a2700.galleryofferlist.normalList.1.5922121885DKou&amp;sp</a> |
| 6                          | sulphuric acid 96 % | 734.24     | 873.75       | [€/Mg] | 2019 | Dr. Felix Jäger Chemikalienhandel | chemical portal price listing 02/2019                                                                                                                                                                                                                                                                                                                       |
| ∅                          |                     | 403.72     | 480.42       |        |      |                                   |                                                                                                                                                                                                                                                                                                                                                             |
| used                       | sulphuric acid 96 % | 400.00     | 476.00       |        |      |                                   |                                                                                                                                                                                                                                                                                                                                                             |
| <b>extraction agent I</b>  |                     |            |              |        |      |                                   |                                                                                                                                                                                                                                                                                                                                                             |
| 1                          | ethyl acetate       | 26.00      | 30.94        | [€/L]  | 2019 | AlphaCrom AG                      | <a href="http://www.alphacrom.com/de/fluessig-fluessig-extraktion">http://www.alphacrom.com/de/fluessig-fluessig-extraktion</a>                                                                                                                                                                                                                             |
| 2                          | ethyl acetate       | 1.00       | 1.19         | [€/L]  | 2019 | Vincentz Network GmbH & Co. KG    | <a href="http://www.farbeundlack.de/Publikationen/Rohstoffreport/RohstoffReport-Online-Preisspiegel">http://www.farbeundlack.de/Publikationen/Rohstoffreport/RohstoffReport-Online-Preisspiegel</a>                                                                                                                                                         |
| 3                          | ethyl acetate       | 2.48       | 2.95         | [€/L]  | 2019 | Dr. Felix Jäger Chemikalienhandel | <a href="https://www.chemikalienportal.de/loesemittel/ethylacetat-1/ethylacetat.html">https://www.chemikalienportal.de/loesemittel/ethylacetat-1/ethylacetat.html</a>                                                                                                                                                                                       |
| 4                          | ethyl acetate       | 3.60       | 4.28         | [€/L]  | 2019 | Dr. Felix Jäger Chemikalienhandel | <a href="https://www.chemikalienportal.de/loesemittel/ethylacetat-1/ethylacetat.html">https://www.chemikalienportal.de/loesemittel/ethylacetat-1/ethylacetat.html</a>                                                                                                                                                                                       |
| 5                          | ethyl acetate       | 30.00      | 35.7         | [€/L]  | 2019 | -                                 | project information Bio <sup>2</sup>                                                                                                                                                                                                                                                                                                                        |
| 6                          | ethyl acetate       | 35.00      | 41.65        | [€/L]  | 2019 | -                                 | project information Bio <sup>2</sup>                                                                                                                                                                                                                                                                                                                        |
| 7                          | ethyl acetate       | 2.48       | 2.95         | [€/L]  | 2019 | Dr. Felix Jäger Chemikalienhandel | chemical portal price listing 02/2019                                                                                                                                                                                                                                                                                                                       |
| 8                          | ethyl acetate       | 10.75      | 12.79        | [€/L]  | 2019 | Bernd Kraft GmbH                  | <a href="https://berndkraft.de/">https://berndkraft.de/</a>                                                                                                                                                                                                                                                                                                 |
| ∅                          |                     | 13.91      | 16.56        | [€/L]  |      |                                   |                                                                                                                                                                                                                                                                                                                                                             |
| used                       | ethyl acetate       | 3.00       |              |        |      |                                   | assumed price for larger purchase quantities                                                                                                                                                                                                                                                                                                                |

Supplementary Table S5/4: Cost data sources of material and services for the biosurfactants production cost analysis and S-LCA.

|                             | substrate            | price      |              | unit   | year | supplier                                           | source                                                                                                                                                                                                                                                                                                                                                                                                                                                                                                                                          |
|-----------------------------|----------------------|------------|--------------|--------|------|----------------------------------------------------|-------------------------------------------------------------------------------------------------------------------------------------------------------------------------------------------------------------------------------------------------------------------------------------------------------------------------------------------------------------------------------------------------------------------------------------------------------------------------------------------------------------------------------------------------|
|                             |                      | net<br>[€] | gross<br>[€] |        |      |                                                    |                                                                                                                                                                                                                                                                                                                                                                                                                                                                                                                                                 |
| <b>extraction agent II</b>  |                      |            |              |        |      |                                                    |                                                                                                                                                                                                                                                                                                                                                                                                                                                                                                                                                 |
| 1                           | n-hexane             | 18.36      | 21.8484      | [€/L]  | 2020 | Carl Roth GmbH + Co. KG                            | <a href="https://www.carlroth.com/at/de/Chemikalien/A-Z-Chemikalien/H/n-Hexan/n-Hexan/p/0000000100008c6800020023_de">https://www.carlroth.com/at/de/Chemikalien/A-Z-Chemikalien/H/n-Hexan/n-Hexan/p/0000000100008c6800020023_de</a>                                                                                                                                                                                                                                                                                                             |
| 2                           | n-hexane             | 30.40      | 36.176       | [€/L]  | 2020 | Thermo Fisher Scientific Inc.                      | <a href="https://www.fishersci.de/shop/products/n-hexane-95-extra-pure-acros-organics-4/p-2691924">https://www.fishersci.de/shop/products/n-hexane-95-extra-pure-acros-organics-4/p-2691924</a>                                                                                                                                                                                                                                                                                                                                                 |
| 3                           | n-hexane             | 27.86      | 33.15        | [€/L]  | 2021 | Zentrum für Energie- und Umweltstudien GmbH        | <a href="https://www.restauro-online.com/epages/63807438.sf/de_DE/?ObjectPath=/Shops/63807438/Products/Z188">https://www.restauro-online.com/epages/63807438.sf/de_DE/?ObjectPath=/Shops/63807438/Products/Z188</a>                                                                                                                                                                                                                                                                                                                             |
| 4                           | n-hexane             | 105.00     | 124.95       | [€/L]  | 2021 | Merck KGaA                                         | <a href="https://www.sigmaaldrich.com/catalog/search?term=110-54-3&amp;interface=CAS%20No.&amp;N=0&amp;mode=partialmaxfocus=product&amp;lang=de&amp;region=DE&amp;focus=product&amp;eclid=EA1alQobChMI JGStsCv5eIVT-R3Ch2kbwVKEAAYAvAAEeLnTvD BwE">https://www.sigmaaldrich.com/catalog/search?term=110-54-3&amp;interface=CAS%20No.&amp;N=0&amp;mode=partialmaxfocus=product&amp;lang=de&amp;region=DE&amp;focus=product&amp;eclid=EA1alQobChMI JGStsCv5eIVT-R3Ch2kbwVKEAAYAvAAEeLnTvD BwE</a>                                                 |
| 5                           | n-hexane             | 35.98      | 42.8162      |        | 2021 | S3 Handel und Dienstleistungen UG                  | <a href="https://shop.es-drei.de/alkane/12314/n-hexan-min.-95?number=S1002140.5">https://shop.es-drei.de/alkane/12314/n-hexan-min.-95?number=S1002140.5</a>                                                                                                                                                                                                                                                                                                                                                                                     |
| 6                           | n-hexane             | 1.18       | 1.4042       |        | 2021 | alibaba.com                                        | <a href="https://german.alibaba.com/p-detail/Price-1600477926669.html?spm=a2700.galleryofferlist.normal_offer.d_title.118c4defz1tvoe&amp;s=p">https://german.alibaba.com/p-detail/Price-1600477926669.html?spm=a2700.galleryofferlist.normal_offer.d_title.118c4defz1tvoe&amp;s=p</a>                                                                                                                                                                                                                                                           |
| 7                           | n-hexane             | 1.32       | 1.57         | [€/L]  | 2021 | alibaba.com                                        | <a href="https://german.alibaba.com/p-detail/organic-1600284680903.html?spm=a2700.galleryofferlist.normal_offer.d_title.118c4defz1tvoe">https://german.alibaba.com/p-detail/organic-1600284680903.html?spm=a2700.galleryofferlist.normal_offer.d_title.118c4defz1tvoe</a>                                                                                                                                                                                                                                                                       |
| 8                           | n-hexane             | 1.65       | 1.96         | [€/L]  | 2021 | alibaba.com                                        | <a href="https://german.alibaba.com/p-detail/Cas-1600656906262.html?spm=a2700.galleryofferlist.normal_offer.d_title.118c4defz1tvoe">https://german.alibaba.com/p-detail/Cas-1600656906262.html?spm=a2700.galleryofferlist.normal_offer.d_title.118c4defz1tvoe</a>                                                                                                                                                                                                                                                                               |
| ∅                           |                      | 27.72      | 32.99        | [€/L]  |      |                                                    |                                                                                                                                                                                                                                                                                                                                                                                                                                                                                                                                                 |
| used                        |                      | 5.00       |              |        |      |                                                    | assumed price for larger purchase quantities                                                                                                                                                                                                                                                                                                                                                                                                                                                                                                    |
| <b>disposal waste water</b> |                      |            |              |        |      |                                                    |                                                                                                                                                                                                                                                                                                                                                                                                                                                                                                                                                 |
| 1                           | waste water disposal | 2.43       | 2.89         | [€/m³] | 2018 | Abwassergesellschaft Halberstadt GmbH              | <a href="http://www.awh.halberstadt.de/index.php/Abwasserentsorgung.html">http://www.awh.halberstadt.de/index.php/Abwasserentsorgung.html</a>                                                                                                                                                                                                                                                                                                                                                                                                   |
| 2                           | waste water disposal | 2.58       | 3.07         | [€/m³] | 2018 | Stadtwerke Finsterwalde GmbH                       | <a href="https://www.stadtwerke-finsterwalde.de/cms/Abwasser/Satzungen/Abwasser-Satzungen/Preisblatt-Abwasserentsorgung-ab-01.01.2020.pdf">https://www.stadtwerke-finsterwalde.de/cms/Abwasser/Satzungen/Abwasser-Satzungen/Preisblatt-Abwasserentsorgung-ab-01.01.2020.pdf</a>                                                                                                                                                                                                                                                                 |
| 3                           | waste water disposal | 2.43       | 2.89         | [€/m³] | 2018 | Zweckverband Ostholstein                           | <a href="https://www.zvo.com/files/downloads/5-unternehmen/pflichtveroeffentlichungen-satzungen/abwasser/ZVO-Schmutzwasserbeseitigung_Gebuehrensatzung_2017.pdf">https://www.zvo.com/files/downloads/5-unternehmen/pflichtveroeffentlichungen-satzungen/abwasser/ZVO-Schmutzwasserbeseitigung_Gebuehrensatzung_2017.pdf</a>                                                                                                                                                                                                                     |
| 4                           | waste water disposal | 2.65       | 3.15         | [€/m³] | 2018 | Gemeinde Weeze                                     | <a href="https://www.weeze.de/c12576b300525dd6/files/satzung_abwassergebuehren_kanalanschlussbeitraege_und_kostenersatz_fuer_grundstuecke_ab_2020.pdf/\$file/satzung_abwassergebuehren_kanalanschlussbeitraege_und_kostenersatz_fuer_grundstuecke_ab_2020.pdf?openelement">https://www.weeze.de/c12576b300525dd6/files/satzung_abwassergebuehren_kanalanschlussbeitraege_und_kostenersatz_fuer_grundstuecke_ab_2020.pdf/\$file/satzung_abwassergebuehren_kanalanschlussbeitraege_und_kostenersatz_fuer_grundstuecke_ab_2020.pdf?openelement</a> |
| 5                           | waste water disposal | 2.47       | 2.94         | [€/m³] | 2018 | Märkischer Abwasser- und Wasserzweckverband (MAWV) | <a href="https://www.mawv.de/files/verband/satzungen/schmutzwasser/01-mawv-schmutzwassergebuehrensatzung-lesefassung.pdf">https://www.mawv.de/files/verband/satzungen/schmutzwasser/01-mawv-schmutzwassergebuehrensatzung-lesefassung.pdf</a>                                                                                                                                                                                                                                                                                                   |
| 6                           | waste water disposal | 2.75       | 3.27         | [€/m³] | 2018 | Städtische Werke Magdeburg GmbH & Co. KG           | <a href="https://www.sw-magdeburg.de/fileadmin/swm/Privatkunden/Abwasser/Dateien/Preisinformation_Abwasserentsorgung.pdf">https://www.sw-magdeburg.de/fileadmin/swm/Privatkunden/Abwasser/Dateien/Preisinformation_Abwasserentsorgung.pdf</a>                                                                                                                                                                                                                                                                                                   |
| 7                           | waste water disposal | 2.68       | 3.19         | [€/m³] | 2018 | Gemeinde Bremerhaven                               | <a href="https://www.bremerhaven.de/de/verwaltung-politik/buergerservice/entsorgungsbetriebe-bremerhaven/entsorgungsbetriebe-bremerhaven-ebb.16447.html">https://www.bremerhaven.de/de/verwaltung-politik/buergerservice/entsorgungsbetriebe-bremerhaven/entsorgungsbetriebe-bremerhaven-ebb.16447.html</a>                                                                                                                                                                                                                                     |
| 8                           | waste water disposal | 2.54       | 3.02         | [€/m³] | 2018 | WasserZweckVerband- Malchin Stavenhagen            | <a href="https://www.wzv-malchin-stavenhagen.de/abwassergebuehren/">https://www.wzv-malchin-stavenhagen.de/abwassergebuehren/</a>                                                                                                                                                                                                                                                                                                                                                                                                               |
| 9                           | waste water disposal | 2.85       | 3.39         | [€/m³] | 2018 | Stadt Krefeld                                      | <a href="https://www.krefeld.de/kbk/Inhalt/uebersicht-ueber-die-abwassergebuehren/">https://www.krefeld.de/kbk/Inhalt/uebersicht-ueber-die-abwassergebuehren/</a>                                                                                                                                                                                                                                                                                                                                                                               |
| 10                          | waste water disposal | 2.92       | 3.48         | [€/m³] | 2018 | Abwasserzweckverband Merseburg                     | <a href="https://azv-merseburg.de/fileadmin/Redaktion/user_upload/Gebuehrensatzung_ab_08.11.2018.pdf">https://azv-merseburg.de/fileadmin/Redaktion/user_upload/Gebuehrensatzung_ab_08.11.2018.pdf</a>                                                                                                                                                                                                                                                                                                                                           |
| ∅                           |                      | 2.63       | 3.13         | [€/m³] |      |                                                    |                                                                                                                                                                                                                                                                                                                                                                                                                                                                                                                                                 |
| used                        | waste water disposal | 2.63       |              | [€/m³] |      |                                                    |                                                                                                                                                                                                                                                                                                                                                                                                                                                                                                                                                 |

Supplementary Table S5/5: Cost data sources of material and services for the biosurfactants production cost analysis and S-LCA.

|                                 | substrate                | price      |              | unit   | year | supplier                                                          | source                                                                                                                                                                                                          |
|---------------------------------|--------------------------|------------|--------------|--------|------|-------------------------------------------------------------------|-----------------------------------------------------------------------------------------------------------------------------------------------------------------------------------------------------------------|
|                                 |                          | net<br>[€] | gross<br>[€] |        |      |                                                                   |                                                                                                                                                                                                                 |
| <b>disposal organic waste</b>   |                          |            |              |        |      |                                                                   |                                                                                                                                                                                                                 |
| 1                               | organic waste disposal   | 107.00     | 127.33       | [€/m³] |      |                                                                   | <a href="https://www.eva-abfallentsorgung.de/preise-und-gebuehren.html">https://www.eva-abfallentsorgung.de/preise-und-gebuehren.html</a>                                                                       |
| 2                               | organic waste disposal   | 78.00      | 92.82        | [€/m³] |      |                                                                   | <a href="http://www.abfallwirtschaft-vechta.de/gebuehren-preise/entsorgungspreise">www.abfallwirtschaft-vechta.de/gebuehren-preise/entsorgungspreise</a>                                                        |
| 3                               | organic waste disposal   | 54.05      | 64.32        | [€/m³] |      |                                                                   | <a href="https://www.aha-region.de/fileadmin/Download/Recht/Abfallgeb%C3%BChrensatzung_01.01.2020.pdf">https://www.aha-region.de/fileadmin/Download/Recht/Abfallgeb%C3%BChrensatzung_01.01.2020.pdf</a>         |
| 4                               | organic waste disposal   | 99.16      | 118.00       | [€/m³] |      |                                                                   | <a href="https://www.awb-es.de/gebuehren/gewerbe/_Gewerbe-Selbstanlieferung~2.html">https://www.awb-es.de/gebuehren/gewerbe/_Gewerbe-Selbstanlieferung~2.html</a>                                               |
| 5                               | organic waste disposal   | 93.73      | 111.54       | [€/m³] |      |                                                                   | <a href="https://www.abfallwirtschaft-freiburg.de/de/umschlagstation/umschlagstation.php">https://www.abfallwirtschaft-freiburg.de/de/umschlagstation/umschlagstation.php</a>                                   |
| 6                               | organic waste disposal   | 180.00     | 214.20       | [€/m³] |      |                                                                   | <a href="https://www.egb-bir.de/fileadmin/pdf-downloads/preisblatt_egb_2018.pdf">https://www.egb-bir.de/fileadmin/pdf-downloads/preisblatt_egb_2018.pdf</a>                                                     |
| 7                               | organic waste disposal   | 191.80     | 228.24       | [€/m³] |      |                                                                   | <a href="https://www.egb-bir.de/fileadmin/pdf-downloads/preisblatt_egb_2018.pdf">https://www.egb-bir.de/fileadmin/pdf-downloads/preisblatt_egb_2018.pdf</a>                                                     |
| 8                               | organic waste disposal   | 126.05     | 150.00       | [€/m³] |      |                                                                   | <a href="https://www.landkreis-heidenheim.de/idc/groups/web/documents/web_asset/cms008823.pdf">https://www.landkreis-heidenheim.de/idc/groups/web/documents/web_asset/cms008823.pdf</a>                         |
| 9                               | organic waste disposal   | 107.39     | 127.80       | [€/m³] |      |                                                                   | <a href="https://www.zak-kempen.de/download/aktuelle-gebuehrensatzung1.pdf">https://www.zak-kempen.de/download/aktuelle-gebuehrensatzung1.pdf</a>                                                               |
| 10                              | organic waste disposal   | 92.44      | 110.00       | [€/m³] |      |                                                                   | <a href="https://www.mkw-grossefehn.de/entsorgung/entsorgungszentrum-grossefehn.html">https://www.mkw-grossefehn.de/entsorgung/entsorgungszentrum-grossefehn.html</a>                                           |
| ∅                               |                          | 112.96     | 134.43       | [€/m³] |      |                                                                   |                                                                                                                                                                                                                 |
| used                            | organic waste disposal   | 112.96     |              | [€/m³] |      |                                                                   |                                                                                                                                                                                                                 |
| <b>disposal hazardous waste</b> |                          |            |              |        |      |                                                                   |                                                                                                                                                                                                                 |
| 1                               | solvent disposal         | 2.02       | 2.40         | [€/kg] |      | GIB Entsorgung Wesermarsch GmbH                                   | <a href="https://www.gib-entsorgung.de/index.php/preisliste.html">https://www.gib-entsorgung.de/index.php/preisliste.html</a>                                                                                   |
| 2                               | solvent disposal         | 1.55       | 1.84         | [€/kg] |      | Hagener Entsorgungsbetrieb HEB GmbH                               | <a href="https://www.heb-hagen.de/rund-um-den-muell/muellverbrennungsanlage/gewerbe/preise.html">https://www.heb-hagen.de/rund-um-den-muell/muellverbrennungsanlage/gewerbe/preise.html</a>                     |
| 3                               | solvent disposal         | 1.02       | 1.21         | [€/kg] |      | AWN Abfallwirtschaftsgesellschaft des Neckar-Odenwald-Kreises mbH | <a href="https://www.awn-online.de/images/downloads/merkblaetter/g10-schadstoffe_merkblatt-preisliste.pdf">https://www.awn-online.de/images/downloads/merkblaetter/g10-schadstoffe_merkblatt-preisliste.pdf</a> |
| 4                               | solvent disposal         | 1.00       | 1.19         | [€/kg] |      | Technische Betriebe Remscheid                                     | <a href="https://www.tbr-info.de/entsorgungspreise.html">https://www.tbr-info.de/entsorgungspreise.html</a>                                                                                                     |
| 5                               | solvent disposal         | 1.30       | 1.55         | [€/kg] |      | Technische Betriebe Remscheid                                     | <a href="https://www.tbr-info.de/entsorgungspreise.html">https://www.tbr-info.de/entsorgungspreise.html</a>                                                                                                     |
| 6                               | solvent disposal         | 1.70       | 2.02         | [€/kg] |      | Berliner Stadtreinigungsbetriebe AöR                              | <a href="https://www.bsr.de/abfall-abc-20563.php?fractionID=ccd0ebe5-83fc-4bb9-a913-23fbc7a58c59">https://www.bsr.de/abfall-abc-20563.php?fractionID=ccd0ebe5-83fc-4bb9-a913-23fbc7a58c59</a>                   |
| 7                               | solvent disposal         | 1.80       | 2.14         | [€/kg] |      | Zweckverband für Abfallwirtschaft in Nordwest-Oberfranken         | <a href="http://www.zaw-coburg.de/problemmuellsammlungen/kleingewerbe/kosten-kleingewerbe.html">http://www.zaw-coburg.de/problemmuellsammlungen/kleingewerbe/kosten-kleingewerbe.html</a>                       |
| 8                               | solvent disposal         | 1.51       | 1.80         | [€/kg] |      | Landkreis Cuxhaven                                                | <a href="https://www.landkreis-cuxhaven.de/media/custom/1779_5347_1.PDF?1512659814">https://www.landkreis-cuxhaven.de/media/custom/1779_5347_1.PDF?1512659814</a>                                               |
| 9                               | solvent disposal         | 1.50       | 1.79         | [€/kg] |      | Stadt Wolfsburg                                                   | <a href="http://www.wolfsburg.de/media/wolfsburg/30_abfallgebuehrensatzung.pdf">www.wolfsburg.de/media/wolfsburg/30_abfallgebuehrensatzung.pdf</a>                                                              |
| 10                              | solvent disposal         | 2.10       | 2.50         | [€/kg] |      | Zweckverband Abfallwirtschaft ZAW Donau-Wald                      | <a href="https://www.awg.de/media/recyclinghoefe_zentren_allgemein.pdf">https://www.awg.de/media/recyclinghoefe_zentren_allgemein.pdf</a>                                                                       |
| ∅                               |                          | 1.55       | 1.84         | [€/kg] |      |                                                                   |                                                                                                                                                                                                                 |
| used                            | hazardous waste disposal | 1.55       |              | [€/kg] |      |                                                                   |                                                                                                                                                                                                                 |



Supplementary Table S5/6: Cost data sources of material and services for the biosurfactants production cost analysis and S-LCA.

|                        | substrate                 | price      |              | unit                | year | supplier                                       | source                                                                                                                                                                                                                                                                                          |
|------------------------|---------------------------|------------|--------------|---------------------|------|------------------------------------------------|-------------------------------------------------------------------------------------------------------------------------------------------------------------------------------------------------------------------------------------------------------------------------------------------------|
|                        |                           | net<br>[€] | gross<br>[€] |                     |      |                                                |                                                                                                                                                                                                                                                                                                 |
| <b>transport costs</b> |                           |            |              |                     |      |                                                |                                                                                                                                                                                                                                                                                                 |
| 1                      | costs per tonne-kilometre | 0.02       | 0.02         | [€/m <sup>3</sup> ] | 2016 | Deutsche Zentrum für Luft- und Raumfahrt e. V. | <a href="https://elib.dlr.de/104581/1/wolfermann-transport_cost_-_an_aggregated_model_for_surface_freight_transport.pdf">https://elib.dlr.de/104581/1/wolfermann-transport_cost_-_an_aggregated_model_for_surface_freight_transport.pdf</a>                                                     |
| 2                      | costs per tonne-kilometre | 0.04362    | 0.05         | [€/m <sup>3</sup> ] | 2020 | Bundesanstalt für Gewässerkunde                | <a href="https://www.bafg.de/DE/08_Ref/U1/02_Projekte/05_Verkehrstraeger/verkehrstraeger_lang.pdf?__blob=publicationFile">https://www.bafg.de/DE/08_Ref/U1/02_Projekte/05_Verkehrstraeger/verkehrstraeger_lang.pdf?__blob=publicationFile</a>                                                   |
| 3                      | costs per tonne-kilometre | 0.07084    | 0.08         | [€/m <sup>3</sup> ] | 2020 | Bundesanstalt für Gewässerkunde                | <a href="https://www.bafg.de/DE/08_Ref/U1/02_Projekte/05_Verkehrstraeger/verkehrstraeger_lang.pdf?__blob=publicationFile">https://www.bafg.de/DE/08_Ref/U1/02_Projekte/05_Verkehrstraeger/verkehrstraeger_lang.pdf?__blob=publicationFile</a>                                                   |
| 4                      | costs per tonne-kilometre | 0.4        | 0.48         | [€/m <sup>3</sup> ] | 2014 | -                                              | Wannenwetsch, H. et al. (2014) Integrierte Materialwirtschaft, Logistik und Beschaffung                                                                                                                                                                                                         |
| 5                      | costs per tonne-kilometre | 0.088      | 0.10         | [€/m <sup>3</sup> ] | 2012 | -                                              | Corsten, H. et al. (2012) Nachhaltigkeit: Unternehmerisches Handeln in globaler Verantwortung                                                                                                                                                                                                   |
| 6                      | costs per tonne-kilometre | 0.06       | 0.07         | [€/m <sup>3</sup> ] | 2020 | Verein Deutscher Zementwerke e.V. (VDZ)        | <a href="https://www.vdz-online.de/fileadmin/gruppen/vdz/3LiteraturRecherche/Studien/Nachhaltige_Transport_und_Logistikketten_Zementindustrie.pdf">https://www.vdz-online.de/fileadmin/gruppen/vdz/3LiteraturRecherche/Studien/Nachhaltige_Transport_und_Logistikketten_Zementindustrie.pdf</a> |
| 7                      | costs per tonne-kilometre | 0.06       | 0.07         | [€/m <sup>3</sup> ] | 2018 | Universität Linz                               | <a href="http://www.energieinstitut-linz.at/v2/wp-content/uploads/2018/01/publizierbarer-Endbericht_850079_SeasonalGridStorage_final.pdf">http://www.energieinstitut-linz.at/v2/wp-content/uploads/2018/01/publizierbarer-Endbericht_850079_SeasonalGridStorage_final.pdf</a>                   |
| 8                      | costs per tonne-kilometre | 0.1        | 0.12         | [€/m <sup>3</sup> ] | 2018 | Universität Linz                               | <a href="http://www.energieinstitut-linz.at/v2/wp-content/uploads/2018/01/publizierbarer-Endbericht_850079_SeasonalGridStorage_final.pdf">http://www.energieinstitut-linz.at/v2/wp-content/uploads/2018/01/publizierbarer-Endbericht_850079_SeasonalGridStorage_final.pdf</a>                   |
| ∅                      |                           | 0.105      | 0.13         | [€/m <sup>3</sup> ] |      |                                                |                                                                                                                                                                                                                                                                                                 |
| used                   | waste water disposal      | 0.105      |              | [€/m <sup>3</sup> ] |      |                                                |                                                                                                                                                                                                                                                                                                 |

## Comparison market prices

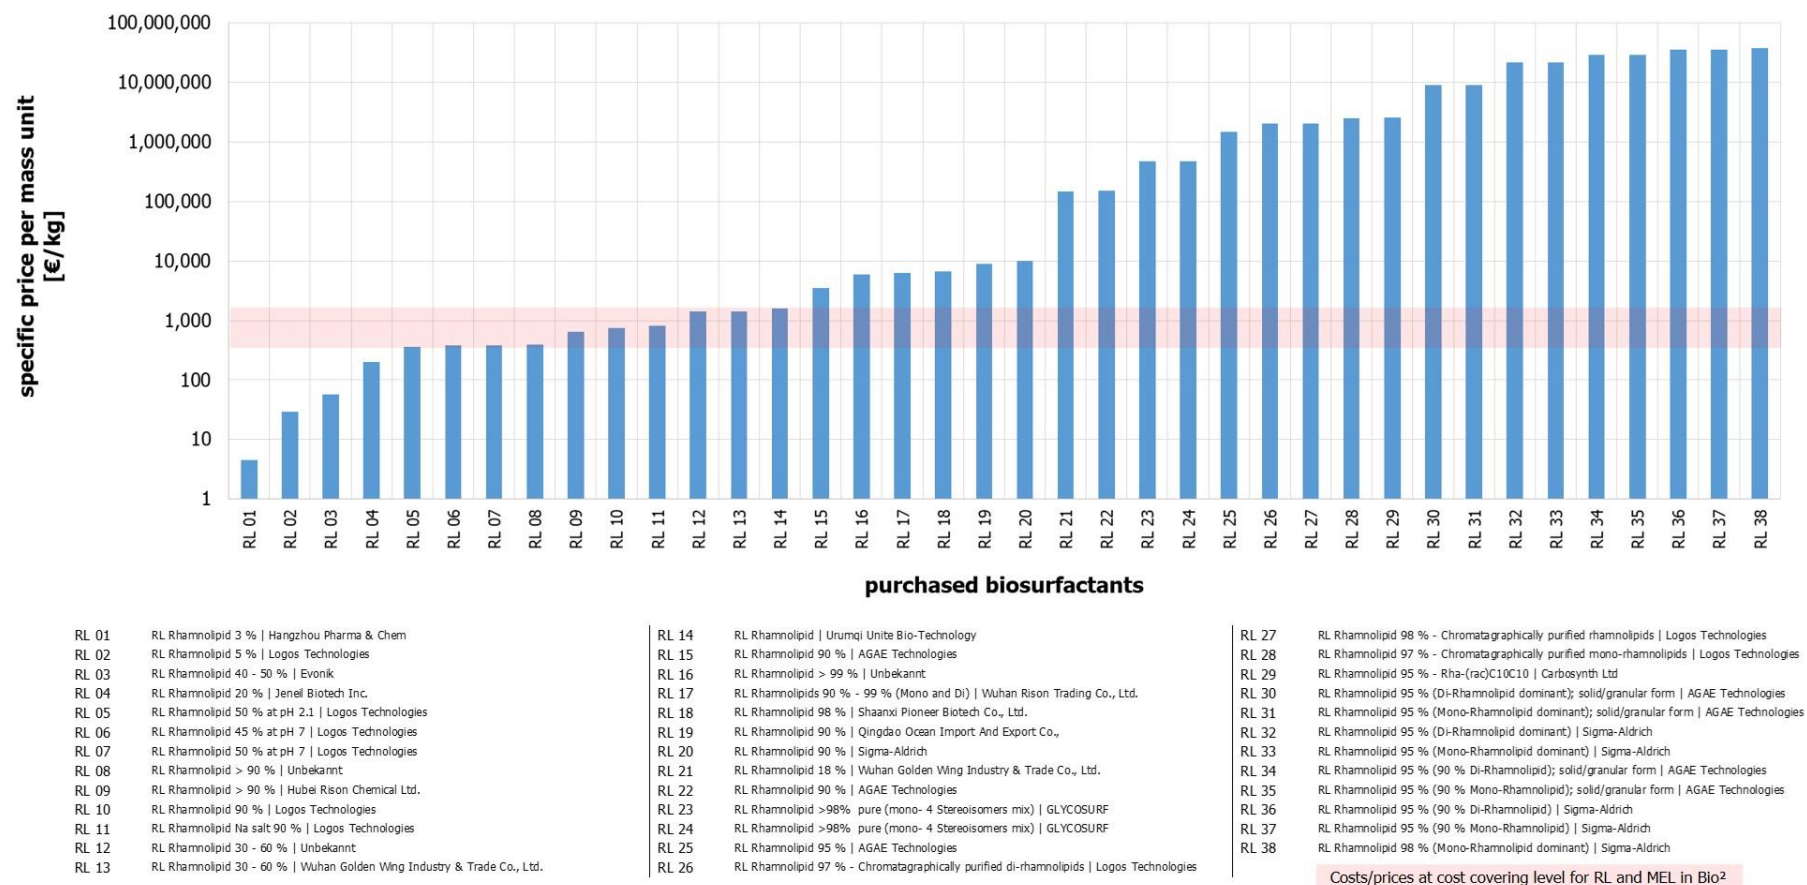

Supplementary Figure S4: Specific prices of diverse rhamnolipids with different properties purchased by different suppliers from various countries; shown prices are partly extrapolated from €/mg to €/kg, for instance. Chart legend shows surfactant description | producer/seller.

Supplementary Table S6: Specific prices for sophorolipids sorted by price under consideration of purity and packaging size; reflecting a similar tendency of pricing structure like for rhamnolipids

| product description                                                                 | purity<br>[% <sub>SL</sub> ] | packaging size | price<br>[€/kg] | source                                                                                                                                                                                                                                                                                                                                                |
|-------------------------------------------------------------------------------------|------------------------------|----------------|-----------------|-------------------------------------------------------------------------------------------------------------------------------------------------------------------------------------------------------------------------------------------------------------------------------------------------------------------------------------------------------|
| Sophorolipid 50 %                                                                   | 50                           | kg range       | 0.90            | <a href="https://www.alibaba.com/product-detail/Sophorolipid_60655401914.html?spm=a2700.7724838.2017115.22.127a691b01r1wx">https://www.alibaba.com/product-detail/Sophorolipid_60655401914.html?spm=a2700.7724838.2017115.22.127a691b01r1wx</a>                                                                                                       |
| Sophorolipid 100 %                                                                  | 50                           | kg range       | 0.90            | <a href="https://german.alibaba.com/product-detail/sophorolipid-60655401914.html?spm=a2700.7724838.2017115.1.5dae691bSNWtng">https://german.alibaba.com/product-detail/sophorolipid-60655401914.html?spm=a2700.7724838.2017115.1.5dae691bSNWtng</a>                                                                                                   |
| Sophorolipid 99 %                                                                   | 99                           | kg range       | 0.90            | <a href="https://www.alibaba.com/product-detail/Sophorolipid_60628100337.html?spm=a2700.7724838.2017115.150.127a691b01r1wx">https://www.alibaba.com/product-detail/Sophorolipid_60628100337.html?spm=a2700.7724838.2017115.150.127a691b01r1wx</a>                                                                                                     |
| Sophorolipid 50 %                                                                   | 50                           | Mg range       | 6.75            |                                                                                                                                                                                                                                                                                                                                                       |
| Biosurfactant Sophorolipid                                                          | 50                           | kg range       | 9.45            | <a href="https://qilubiogroup.en.alibaba.com/product/60707991909-804398105/Biosurfactants_Sophorolipid.html?spm=a2700.icbuShop.41413.8.709f6a77KW7HhM">https://qilubiogroup.en.alibaba.com/product/60707991909-804398105/Biosurfactants_Sophorolipid.html?spm=a2700.icbuShop.41413.8.709f6a77KW7HhM</a>                                               |
| Sophorolipid used for agricultural chemicals                                        | 50                           | kg range       | 10.35           | <a href="https://www.alibaba.com/product-detail/Sophorolipid-used-for-agricultural-chemicals_60776970081.html?spm=a2700.7724838.2017115.63.10f01e83Kzs9wz">https://www.alibaba.com/product-detail/Sophorolipid-used-for-agricultural-chemicals_60776970081.html?spm=a2700.7724838.2017115.63.10f01e83Kzs9wz</a>                                       |
| Sophorolipids biosurfactant SL50                                                    | 50                           | Mg range       | 15.92           | <a href="http://www.envgreen.cn/offer/582858934819.html?spm=a2615.2177701.autotrace-offerGeneral.1.493a46d3RsgnL7">www.envgreen.cn/offer/582858934819.html?spm=a2615.2177701.autotrace-offerGeneral.1.493a46d3RsgnL7</a>                                                                                                                              |
| Factory support Lactonic Sophorolipid                                               | 99                           | kg range       | 21.6            | <a href="https://www.alibaba.com/product-detail/Factory-support-Lactonic-Sophorolipid-CAS-148409_60814445984.html?spm=a2700.7724838.2017115.103.10f01e83Kzs9wz">https://www.alibaba.com/product-detail/Factory-support-Lactonic-Sophorolipid-CAS-148409_60814445984.html?spm=a2700.7724838.2017115.103.10f01e83Kzs9wz</a>                             |
| Sophorolipids Biosurfactant SL50                                                    | 50                           | kg range       | 22.5            | <a href="https://www.alibaba.com/product-detail/Sophorolipids-Biosurfactant-SL50_60740541974.html?spm=a2700.7724838.2017115.72.10f01e83Kzs9wz">https://www.alibaba.com/product-detail/Sophorolipids-Biosurfactant-SL50_60740541974.html?spm=a2700.7724838.2017115.72.10f01e83Kzs9wz</a>                                                               |
| Lactonic Sophorolipid/Sophorolipid                                                  | 99                           | kg range       | 25.50           | <a href="https://german.alibaba.com/product-detail/Factory-Supply-Lactonic-Sophorolipid-Sophorolipid-CAS-60827522768.html?spm=a2700.7724838.2017115.27.5dae691bSNWtng">https://german.alibaba.com/product-detail/Factory-Supply-Lactonic-Sophorolipid-Sophorolipid-CAS-60827522768.html?spm=a2700.7724838.2017115.27.5dae691bSNWtng</a>               |
| Biosurfactant Sophorolipid                                                          | 85                           | kg range       | 31.50           | <a href="https://qilubiogroup.en.alibaba.com/product/60707991909-804398105/Biosurfactant_Sophorolipid_better_than_rhamnolipid.html?spm=a2700.icbuShop.41413.8.709f6a77KW7HhM">https://qilubiogroup.en.alibaba.com/product/60707991909-804398105/Biosurfactant_Sophorolipid_better_than_rhamnolipid.html?spm=a2700.icbuShop.41413.8.709f6a77KW7HhM</a> |
| Biosurfactant Sophorolipid 99 %                                                     | 99                           | kg range       | 36.00           | <a href="https://www.alibaba.com/product-detail/High-efficient-Biosurfactant-Sophorolipids-use-for_60773849267.html?spm=a2700.7724838.2017115.246.127a691b01r1wx">https://www.alibaba.com/product-detail/High-efficient-Biosurfactant-Sophorolipids-use-for_60773849267.html?spm=a2700.7724838.2017115.246.127a691b01r1wx</a>                         |
| Sophorolipid 50 %                                                                   | 50                           | kg range       | 54.00           | <a href="https://german.alibaba.com/product-detail/High-Quality-Raw-Material-Sophorolipid-60251213862.html?spm=a2700.7724838.2017115.9.5dae691bSNWtng">https://german.alibaba.com/product-detail/High-Quality-Raw-Material-Sophorolipid-60251213862.html?spm=a2700.7724838.2017115.9.5dae691bSNWtng</a>                                               |
| Lactonic Sophorolipid 99 %                                                          | 99                           | kg range       | 79.65           | <a href="https://www.lookchem.com/product_lower-Price-Laetonic-Sophorolipid/18049075.html">https://www.lookchem.com/product_lower-Price-Laetonic-Sophorolipid/18049075.html</a>                                                                                                                                                                       |
| Biosurfactant Sophorolipid 100 %                                                    | 100                          | kg range       | 180.00          |                                                                                                                                                                                                                                                                                                                                                       |
| Sophorolipid Food Grade 98%                                                         | 98                           | kg range       | 225.00          | <a href="https://german.alibaba.com/product-detail/Food-Grade-98-Purity-Sophorolipid-CAS-60628100337.html?spm=a2700.7724838.2017115.147.5dae691bSNWtng">https://german.alibaba.com/product-detail/Food-Grade-98-Purity-Sophorolipid-CAS-60628100337.html?spm=a2700.7724838.2017115.147.5dae691bSNWtng</a>                                             |
| Sophorolipids biosurfactant S40                                                     | 40                           | kg range       | 1,528.20        | <a href="http://www.envgreen.cn/offer/582533456261.html?spm=a2615.2177701.autotrace-offerGeneral.7.493a46d3RsgnL7">http://www.envgreen.cn/offer/582533456261.html?spm=a2615.2177701.autotrace-offerGeneral.7.493a46d3RsgnL7</a>                                                                                                                       |
| Lactonic (di-acetylated) Sophorolipids                                              | 85                           | g range        | 57,100.00       | <a href="https://www.carbosynth.com/carbosynth/website.nsf/(w-productdisplay)/71834A54140D866880257ECC0037FF96">https://www.carbosynth.com/carbosynth/website.nsf/(w-productdisplay)/71834A54140D866880257ECC0037FF96</a>                                                                                                                             |
| Acidic Sophorolipids mix-acetylated - mixture of C30H54O13, C32H56O14 and C34H58O16 | 95                           | g range        | 57,100.00       | <a href="https://www.carbosynth.com/carbosynth/website.nsf/(w-productdisplay)/E63A39A62A23BFB480257ECC0038B9C4">https://www.carbosynth.com/carbosynth/website.nsf/(w-productdisplay)/E63A39A62A23BFB480257ECC0038B9C4</a>                                                                                                                             |
| Acidic Sophorolipids non-acetylated                                                 | 95                           | g range        | 65,350.00       | <a href="https://www.carbosynth.com/carbosynth/website.nsf/(w-productdisplay)/CF8CE58F959C2C6780257ECC0038243F">https://www.carbosynth.com/carbosynth/website.nsf/(w-productdisplay)/CF8CE58F959C2C6780257ECC0038243F</a>                                                                                                                             |
| Bola Sophorolipids                                                                  | 95                           | g range        | 86,650.00       | <a href="https://www.carbosynth.com/carbosynth/website.nsf/(w-productdisplay)/2EA4818429192AA280257DD3003F6913">https://www.carbosynth.com/carbosynth/website.nsf/(w-productdisplay)/2EA4818429192AA280257DD3003F6913</a>                                                                                                                             |

## II. Supplementary chapter S-LCA

### Background S-LCA

Relevant social impact categories in the context of surfactant production were identified by the sustainability reports of four German surfactant-producing chemical companies, which show similar focus areas of assessment.<sup>1-4</sup> Criteria of fair salaries, gender equity, accident prevention and trade union aspects can be found in these reports and show their relevance for surfactant production. The applied indicator selection can be underpinned by the following studies and conditions. Although the geographical relation of the present study (Europe) can be called a “socially related safe ground”, which offers one of the highest levels of social protection,<sup>5</sup> the social dimension of sustainability requires a closer examination. Despite the general status, the EU has to deal with different problems associated to social indicators. As stated in the annual report of the European Social Protection Committee,<sup>6</sup> the EU faces some problems regarding social aspects like at-risk-of-poverty rates or inequalities in access to healthcare and in health outcomes. Moreover, the EU member states have not reached the defined aim of “lifting 20 million people out of the risk of poverty or social exclusion” until 2020, for example.<sup>6, 7</sup> Although the evaluation at EU level is a very superordinate and broad reflection, it is worth to look at the national level. The review of German data for salary-related issues shows that the number of employees paid according to (or in line with) collective agreements has decreased over the last 20 years from 80% to 63% and that the share of low wage workers is one of the largest within the European Union (> 22%).<sup>8, 9</sup> Furthermore, the decreased level of organization by workers’ union (from > 30% in the early 90’s to < 20% in the last years) gives reason enough to study the aspect of workers’ rights more closely.<sup>10</sup> The non-adjusted gender pay gap (general difference of wage between women and men) in Germany was still at 21% in 2019, the adjusted pay gap (difference at exactly identical work) was at 6% in 2016,<sup>11</sup> which gives reason to be studied. In relation to health, statistics reveal that compared to most other EU countries, the specific incidence rate per 100,000 persons employed (non-fatal accidents) is clearly higher in Germany and the number of

accidents at work by economic activity are clearly higher in the manufacturing sector than in the energy supply sector for example.<sup>12</sup> A closer look at these aspects could help to minimize impacts in these areas by process design. To discuss these aspects further, in this study the method of social LCA (S-LCA) was applied.

### **Study framework S-LCA**

Similar to the goals of the LCA and CA, the goal of the S-LCA was to determine the most relevant social impacts associated with the process chains and an identification of the most contributing processes. The S-LCA focuses on specific social aspects that are affected by certain parts of the process chains. The system boundaries for S-LCA comprise the processing stages as stated for LCA for a biosurfactant production of 15,000 kg per year. With regard to the CMC-based function of the considered process chains, the functional unit “mass of product necessary to fulfill the same specific cleaning performance (SCP) as 1 kg of MEL” was also applied for S-LCA.

### **Impact categories and indicators S-LCA**

The S-LCA guidelines<sup>13</sup> distinguish different stakeholder groups: workers, the local community in which the workplace is situated, the society in which the local community is nested, the heterogeneous group of value chain actors (this can be industry, site owners, banks, governments, etc.), consumers, and with the latest updated guideline version also children. For the production of biosurfactants, this assessment focused on the stakeholder group of workers with the social impacts of fair salary, trade unionism, gender wage gap, and non-fatal accidents at work. The choice of impacts was based on sustainability reports of businesses in the chemical industry (see<sup>1-4</sup>) by identifying relevant social issues in this branch. In the present study, the evaluation of these impact categories is limited to the process chain related background of material and energy flows (see statement in section “Contributing economic sectors”). By using

the previously described S-LCA approach and the PSILCA database, results are given in medium risk hours (mrh); whereby a lower impact value can be categorized as the more advantageous result. Information on the used unit, further methodological explanations and the database PSILCA can be found in different publications.<sup>14-16</sup> The results were eventually transferred to SCP-related values to gain a more adequate comparability of RL and MEL.

### **Applied data for S-LCA**

To conduct the S-LCA, all energy and material flows, which enter and leave the system (e.g., molasses, electricity, water, waste), needed to be converted to a single monetary unit. For this, quantity data from LCA and CA was converted to specific monetary input values in US \$ per mass of product to define a demand vector for the input-output model (exchange rate: 1.0 € = 1.1 \$)<sup>17</sup>. The sectoral structure is given by the database PSILCA, which in turn is oriented to the classification of economic activities by NACE code.<sup>15, 18</sup> The monetary input data of the S-LCA per process stage and economic sector (e.g., specific cost for electricity supply, substrates, etc.), is illustrated in Supplementary Table S7. An extended description of the data processing and methodological descriptions can be found in Springer et al.<sup>16</sup>

Supplementary Table S7: Input data of the considered process chains for RL and MEL production with substrate molasses (RL\_MOL, MEL\_MOL) including quantitative data for the invested US \$ per kg of product related to economic sector (sectoral demand) and process stage for S-LCA.

| product<br>process stage<br>unit             | <u>RL MOL</u> |             |               |             |              |              |              |             |             | total p.e.s.<br>\$/kg |                |
|----------------------------------------------|---------------|-------------|---------------|-------------|--------------|--------------|--------------|-------------|-------------|-----------------------|----------------|
|                                              | RL01          | RL02        | RL03          | RL04        | RL05         | RL06         | RL07         | RL08        | RL09        |                       |                |
|                                              | \$/kg         | \$/kg       | \$/kg         | \$/kg       | \$/kg        | \$/kg        | \$/kg        | \$/kg       | \$/kg       |                       |                |
| Agriculture and hunting                      | 376.40        | -           | -             | -           | -            | -            | -            | -           | -           | -                     | 376.40         |
| Electricity and district heat                | 185.01        | 0.08        | 6.86          | 0.01        | 1.36         | 0.12         | 0.02         | 0.00        | 0.03        | 0.03                  | 193.50         |
| Gas supply                                   | -             | -           | 0.03          | 0.00        | -            | 1.29         | -            | 0.01        | 0           | 0                     | 1.33           |
| Machines                                     | 31.46         | -           | -             | -           | -            | -            | -            | -           | -           | -                     | 31.46          |
| Manufacture of chemical products             | -             | -           | 66.33         | 0.00        | 96.09        | -            | 41.61        | -           | -           | -                     | 204.03         |
| Manufacture of fabricated metal products     | -             | 8.8         | 61.37         | 1.93        | 6.8          | 1.13         | 3.3          | 1.01        | 1.21        | 1.21                  | 85.55          |
| Manufacture of food products                 | 4.60          | -           | -             | -           | -            | -            | -            | -           | -           | -                     | 4.60           |
| Manufacture of Non-metallic mineral products | -             | 0.03        | 0.42          | -           | 1.08         | 1.38         | 0.00         | 0.00        | 0.00        | 0.00                  | 2.92           |
| Manufacture of plastic products              | -             | -           | 34.83         | -           | -            | -            | -            | -           | -           | -                     | 34.83          |
| Road and pipeline transport                  | 59.66         | -           | -             | -           | -            | -            | -            | -           | -           | -                     | 59.66          |
| Waste disposal and sewerage services         | -             | -           | 5.08          | -           | 0.76         | 21.58        | 1.16         | 0.09        | -           | -                     | 28.67          |
| Water supply                                 | 0.00          | -           | 0.33          | 0.00        | -            | -            | 0.00         | -           | -           | -                     | 0.33           |
| <b>total per process stage</b>               | <b>657.13</b> | <b>8.91</b> | <b>175.25</b> | <b>1.95</b> | <b>106.1</b> | <b>25.50</b> | <b>46.09</b> | <b>1.11</b> | <b>1.24</b> | <b>1.24</b>           | <b>1023.28</b> |

  

| product<br>process stage<br>unit             | <u>MEL MOL</u> |             |              |             |              |             |             |             | total p.e.s.<br>\$/kg |               |
|----------------------------------------------|----------------|-------------|--------------|-------------|--------------|-------------|-------------|-------------|-----------------------|---------------|
|                                              | MEL01          | MEL02       | MEL03        | MEL04       | MEL05        | MEL06       | MEL07       | MEL08       |                       |               |
|                                              | \$/kg          | \$/kg       | \$/kg        | \$/kg       | \$/kg        | \$/kg       | \$/kg       | \$/kg       |                       |               |
| Agriculture and hunting                      | 67.94          | -           | -            | -           | -            | -           | -           | -           | -                     | 67.94         |
| Electricity and district heat                | 33.39          | 0.01        | 1.49         | 0.00        | 0.1          | 0.02        | 0.02        | 0.06        | 0.06                  | 35.09         |
| Gas supply                                   | -              | -           | 0.00         | 0.00        | 0.08         | 0.01        | 0.01        | 0.01        | 0.01                  | 0.11          |
| Machines                                     | 5.68           | -           | -            | -           | -            | -           | -           | -           | -                     | 5.68          |
| Manufacture of chemical products             | -              | -           | 32.55        | 0.05        | 12.7         | 2.61        | 2.61        | -           | -                     | 50.51         |
| Manufacture of fabricated metal products     | -              | 1.72        | 13.68        | 0.64        | 2.84         | 2.7         | 1.52        | 1.14        | 1.14                  | 24.24         |
| Manufacture of food products                 | 0.83           | -           | -            | -           | -            | -           | -           | -           | -                     | 0.83          |
| Manufacture of non-metallic mineral products | -              | 0.00        | 0.03         | -           | 0.03         | 0.01        | 0.01        | 0.02        | 0.02                  | 0.10          |
| Manufacture of plastic products              | -              | -           | 6.64         | -           | -            | -           | -           | -           | -                     | 6.64          |
| Road and pipeline transport                  | 10.77          | -           | -            | -           | -            | -           | -           | -           | -                     | 10.77         |
| Waste disposal and sewerage services         | -              | -           | 0.95         | -           | 1.82         | 0.22        | 0.22        | 0.03        | 0.03                  | 3.24          |
| Water supply                                 | 0.00           | -           | 0.06         | 0.00        | -            | 0.02        | -           | -           | -                     | 0.08          |
| <b>total per process stage</b>               | <b>118.61</b>  | <b>1.74</b> | <b>55.40</b> | <b>0.69</b> | <b>17.55</b> | <b>5.59</b> | <b>4.39</b> | <b>1.26</b> | <b>1.26</b>           | <b>205.23</b> |

*RL01 sugar beet production and processing; RL02 storage and preparation; RL03 fermentation; RL04 seed fermentation; RL05 precipitation; RL06 precipitation recovery; RL07 extraction; RL08 extraction recovery; RL09 final conditioning and storage; MEL01 sugar beet production and processing; MEL02 storage and preparation; MEL03 fermentation; MEL04 seed fermentation; MEL05 extraction 01 (incl. recovery); MEL06 extraction 02 (incl. recovery); MEL07 extraction 03 (incl. recovery); MEL08 final conditioning and storage; p.e.s. = per economic sector*

## Results of S-LCA

### *Social Life Cycle Assessment*

For S-LCA, the production of RL and MEL only with molasses as a substrate was compared due to the expectation of more significant differences between different products than between different substrates. The following two sections provide results for selected social impacts and contributing economic sectors.

### *Selected social impacts*

The S-LCA reveals impact values of underlying material and energy flows in RL and MEL production. As stated above, these impact values are expressed in medium risk hours (mrh) for each impact category. It is important to note that each impact category has its specific mrh measure, i.e., the impact category fair salary (FS mrh), for instance, cannot be compared with trade unionism (TU mrh) or gender wage gap (GWP mrh). Hence, it is the two types of products that can be compared in specific mrh within one impact category. Supplementary Figure S5 shows that RL production yields roughly 15 times higher mrhs than MEL production, implying higher impacts of detrimental procedures in all considered categories.

This means that the supply chain of RL production bears a considerably higher impact in the assessed impact categories compared to the MEL production. As the results show, it is to be expected that further categories would result in similar ratios of mrhs between RL and MEL production with molasses as a substrate. The same applies for the assessment of SBP as a substrate, due to the given inputs described in section “Applied data”. For further studies it would be useful to include alternative substrates as well as different geographical references (e.g., manufacturing of chemical products in alternative countries) to find the lowest impact level for the production of RL and MEL. Furthermore, the impacts generated by the surfactant production itself, which requires the acquisition of own process-specific data, should be considered in further work.



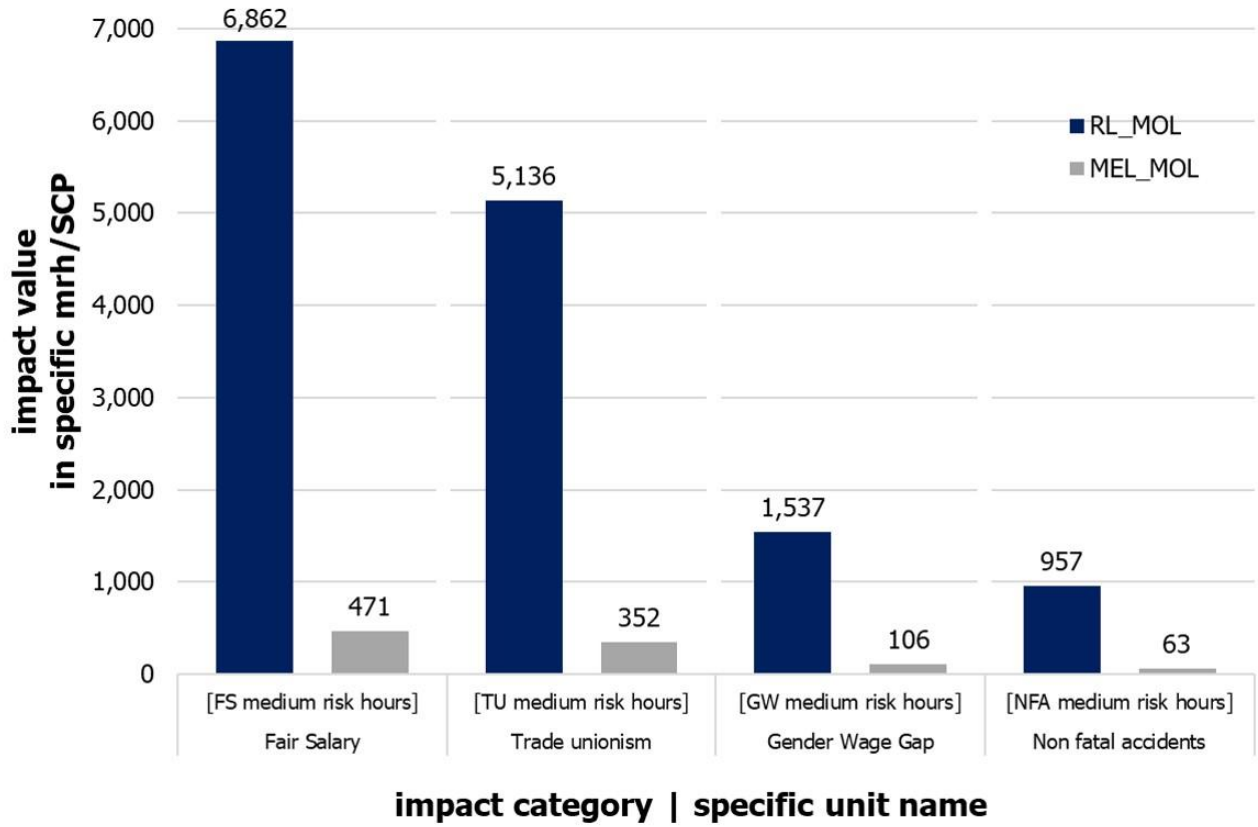

Supplementary Figure S5: Results for the comparison of RL and MEL production by selected categories of S-LCA per specific cleaning performance (SCP).

### Contributing economic sectors

The superiority of MEL over RL regarding social issues raises the question of the responsible economic activities in the respective supply chains. Clearly, the production of RL and MEL differ, entailing different labor intensity in various sectors. In order to reveal these differences, the above-regarded impact categories were additionally examined for the responsible economic sectors (classification by NACE code).<sup>18</sup> For the most relevant sectors, Supplementary Figure S6 gives an overview for each impact category, each graph comparing RL and MEL production. The results reveal that especially the sector “manufacture of chemical products” is the greatest impact driver in all impact categories. “Manufacture of fabricated metal products and of plastic products” also inherit considerable – but smaller – impacts in this supply chain. Obviously, high impact values in chemical, metal, and plastic product manufacturing stem from the combination of the specific indicators’ impact factors (as compiled in internationally recognized databases) and the inventory result, i.e., how much work needs to be done in the specific sectors. As the manufacture of chemical products stands out very clearly in Supplementary Figure S6, a detailed analysis of the required chemical products in both product chains was done. It reveals that in RL production, the need for acetone as a precipitation agent makes up 55% of chemical products (among extraction agent, mineral medium, compressed air, and acidification agent in descending order). This is the case albeit the calculation respects an acetone-recycling rate of 80%. Hence, this agent is an influential driver of social impacts, which should be reduced by means of a higher recycling rate. For MEL production, the use of the mineral medium makes up 64% of chemical products (among extraction agent, compressed air, and acidification agent in descending order). Here, recycling is not possible, as it is consumed by the microorganisms. Hence, it is recommended to

evaluate alternative options to limit the social impact of the chemical sector as the greatest driver of social impacts in RL and MEL production.

As mentioned before, the present study does not include impacts associated with the actual operation of the examined production plant. Reasons for the non-availability of data can be seen in the difficulties and high efforts to collect own data for a consideration of labor and the objectives within the related project. Summarized, it is obvious that specific supply chains are mainly responsible for social impacts. The identified impact sources may be influenceable by an adjusted process design and improvements in the field of resource consumption. As an indirect option of reducing the amount of needed chemicals and the coupled social impact, the increase of yields is applicable also in this case, for example.

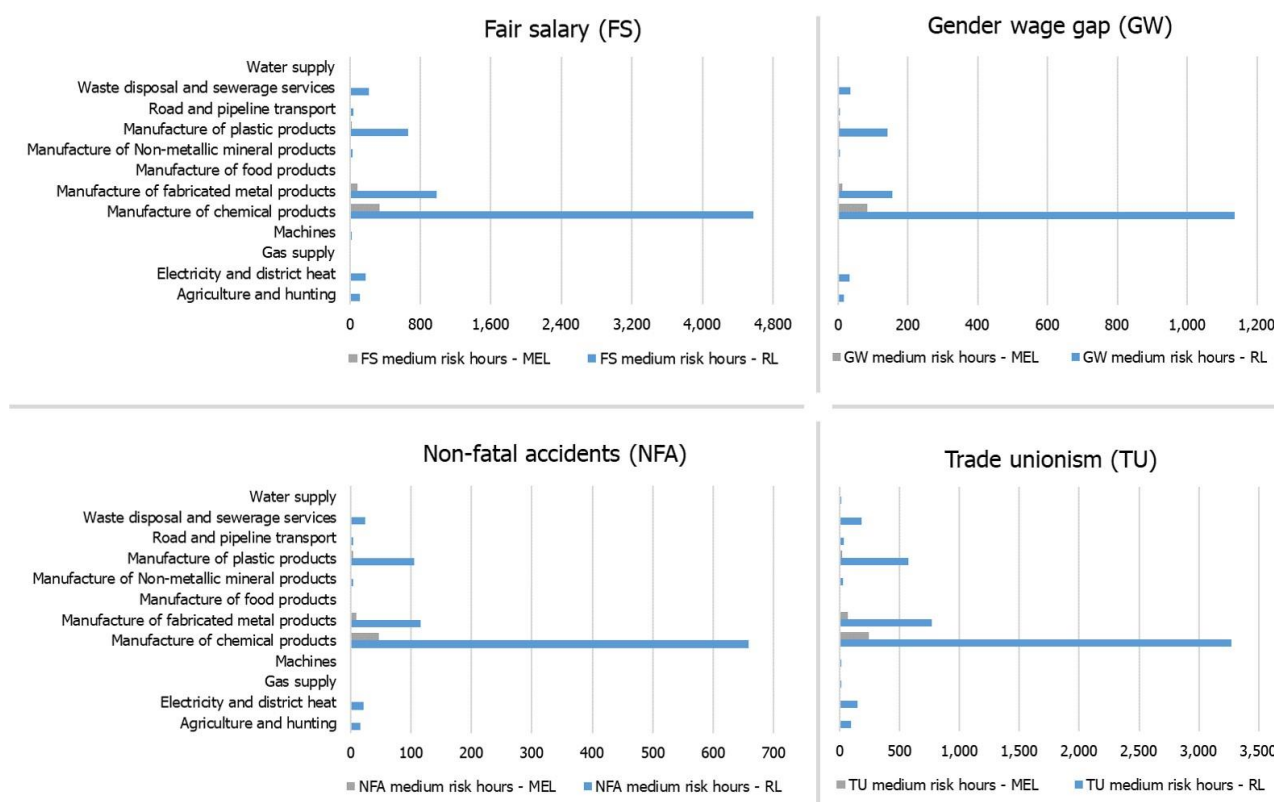

Supplementary Figure S6: Exemplary results of the S-LCA for the RL and MEL production by selected categories “fair salary” (FS), “gender wage gap” (GW), “Non-fatal accidents” (NFA), and “trade unionism” (TU) per chain specific process/sector.

## Literature

1. BASF, *BASF-Bericht 2019 - Ökonomische, ökologische und gesellschaftliche Leistung*, BASF SE, Ludwigshafen, 2020.
2. Bayer, *Nachhaltigkeitsbericht 2019*, Bayer AG, Leverkusen, 2020.
3. Evonik, *Nachhaltigkeitsbericht 2019 - Leading Beyond Chemistry*, Evonik Industries AG, Essen, 2020.
4. Henkel, *Nachhaltigkeitsbericht 2019*, Henkel AG & Co. KG a A, Düsseldorf, 2020.
5. European Parliament, *Social Europe: what Parliament is doing on social policy*, Report REF: 20170616STO77648, European Parliament, 2019.
6. EU-SPC, *Review of the social situation and the development in the social protection policies in the Member States and the Union - 2019 Annual Report from the Social Protection Committee*, EU - Commission Directorate-General for Employment, Social Affairs and Inclusion, Brussels (BE), 2019.
7. EU-SPC, *2021 SPC annual review of the social protection performance monitor (SPPM) and developments in social protection policies : report on key social challenges and key messages*, Report 9978-92-76-43539-6, Social Protection Committee (SPC), Luxembourg (LUX), 2021.
8. H. Schneider and S. Vogel, *Tarifbindung der Beschäftigten in Deutschland: Eine Auswertung des Sozioökonomischen Panels*, 2018.
9. M. M. Grabka and C. Schröder, *DIW-Wochenbericht*, 2019, 86, 249-257.
10. A. Hassel and W. Schroeder, *GEWERKSCHAFTEN 2030 - Rekrutierungsdefizite, Repräsentationslücken und neue Strategien der Mitgliederpolitik*, Wirtschafts- und Sozialwissenschaftliches Institut (WSI) der Hans-Böckler-Stiftung, Düsseldorf, 2018.
11. BMFSFJ, *Report by the Federal Government on the effectiveness of the Act to Promote Transparency in Wage Structures among Women and Men*, The Federal Ministry for Family Affairs, Senior Citizens, Women and Youth (BMFSFJ), 2020.
12. Eurostat, *Accidents at work statistics*, [https://ec.europa.eu/eurostat/statistics-explained/index.php?title=Accidents\\_at\\_work\\_statistics](https://ec.europa.eu/eurostat/statistics-explained/index.php?title=Accidents_at_work_statistics), accessed 01.03.2023).
13. UNEP, *Guidelines for Social Life Cycle Assessment of Products and Organizations 2020*, United Nations Environment Programme (UNEP) / Life Cycle Initiative / Social LC Alliance, Nairobi (KEN), 2020.
14. C. Di Noi, A. Ciroth, L. Mancini, U. Eynard, D. Pennington and G. A. Blengini, *Can S-LCA methodology support responsible sourcing of raw materials in EU policy context?*, *The International Journal of Life Cycle Assessment*, 2020, **25**, 332-349. DOI: 10.1007/s11367-019-01678-8
15. PSILCA-DB, *PSILCA - Understanding social impacts*. Berlin: GreenDelta GmbH. 2021, <https://psilca.net/>, (accessed 01.03.2023).
16. S. K. Springer, C. Wulf and P. Zapp, *Potential Social Impacts regarding working conditions of Fuel Cell Electric Vehicles*, *International Journal of Hydrogen Energy*, 2023, DOI: 10.1016/j.ijhydene.2023.04.034.
17. ECB, Euro foreign exchange reference rates, [https://www.ecb.europa.eu/stats/policy\\_and\\_exchange\\_rates/euro\\_reference\\_exchange\\_rates/html/index.en.html](https://www.ecb.europa.eu/stats/policy_and_exchange_rates/euro_reference_exchange_rates/html/index.en.html), (accessed 01.03.2023).
18. EU, *Regulation (...) Establishing the Statistical Classification of Economic Activities Nace Revision 2 and Amending Council Regulation (Eec) No 3037/90 as Well as Certain Ec Regulations on Specific Statistical Domains*. 2006. <https://eur-lex.europa.eu/legal-content/EN/TXT/HTML/?uri=CELEX:32006R1893&from=EN> (accessed 01.03.2023)
